# Supplementary material for: Altered corticolimbic connectivity reveals sex-specific adolescent outcomes in a rat model of early life adversity
Source: eLife. 2020 Jan 20;9:e52651. doi: 10.7554/eLife.52651 (PMC7010412; doi:10.7554/eLife.52651)
Supplement: Figure 1—source data 1. [file elife-52651-fig1-data1.xlsx]

## Sheet: P21
Ave Volume:	367668750		Counted	Missing	Caudate	Central amygdala	Other	Total Bolus	BLA	Notes	% of BLA full	% of bolus out BLA	Total Innervation
21.03	M	CON	3	3	6600000	6720000	0	462720000	449400000		122.23	2.87863	173599
21.29	M	CON	5	1	36700000	8040000	0	399940000	355200000		96.6087	11.1867	1884878
21.45	M	CON	2	2	14400000		0	240000000	225600000		61.3596	6	1.54087e+06
21.47	M	CON	3	1	7860000		0	307460000	299600000		81.4864	2.55643	2.54603e+06
21.68	M	CON	3	1		13500000	3180000	303880000	287200000		78.1138	5.48901	1.42581e+06
21.8	M	CON	4	0	7056000		73584000	511920000	431280000		117.301	15.7525	1.29627e+06
21.87	M	CON	4	0	24480000	13680000	20816000	395504000	336528000		91.5302	14.9116	749130
21.88	M	CON	6	0	21600000	22320000	35480000	500456000	421056000		114.52	15.8655	1.38273e+06
21.17	M	ELS	4	2	24600000		0	319200000	294600000		80.1265	7.70677	1.43932e+06
21.26	M	ELS	5	1	52800000	3300000	0	413700000	357600000		97.2615	13.5606	1473073
21.51	M	ELS	4	1	31200000	67200000	0	362400000	264000000		71.8038	27.1523	1.05631e+06
21.73	M	ELS	6	0	10500000		52300000	480700000	417900000		113.662	13.0643	1.54171e+06
21.72	M	ELS	4	0	38200000		38900000	449000000	371900000		101.151	17.1715	1.3357e+06
21.74	M	ELS	6	0	10500000		0	256900000	246400000		67.0168	4.08719	1.12681e+06
21.83	M	ELS	6	0		19886400	11894400	436068800	404288000		109.96	7.28802	1.77959e+06
21.82	M	ELS	5	0			102384000	546192000	443808000	lots of background stain	120.709	18.7451	239752
21.16	F	CON	3	1			0	322800000	322800000	bit too far back	87.7964	0	904282
21.23	F	CON	6	0		30000000	0	309300000	279300000		75.9651	9.69932	1.34406e+06
21.24	F	CON	5	1		16680000	0	273480000	256800000		69.8455	6.09917	1.12531e+06
21.43	F	CON	6	0			0	400800000	400800000		109.011	0	407537
21.77	F	CON	6	0			38200000	341100000	302900000		82.3839	11.1991	652595
21.9	F	CON	5	0		64080000	10448000	535328000	460800000		125.33	13.9219	1685580
21.89	F	CON	5	0			11478000	475174000	463696000		126.118	2.41554	1.0625e+06
21.22	F	ELS	5	1		18000000	0	358800000	340800000		92.6921	5.01672	3.37751e+06
21.35	F	ELS	6	0			80700000	570900000	490200000	striatal path	133.327	14.1356	1.72239e+06
21.31	F	ELS	3	1	520000	26400000	0	258520000	231600000		62.9915	10.4131	3034946
21.53	F	ELS	4	2			0	233600000	233600000		63.5355	0	2.12742e+06
21.61	F	ELS	3	3		33000000	0	318600000	285600000		77.6786	10.3578	1.79407e+06
21.54	F	ELS	5	1		40200000	0	371400000	331200000	far back?	90.0811	10.8239	3934921
21.85	F	ELS	6	0	36720000		9576000	441036000	394740000		107.363	10.4971	1.90429e+06

## Sheet: P31
Ave Volume:	4.24083e+08		Counted	Missing	Caudate	Central amygdala	Other	Total Bolus	BLA	Notes	% of BLA full	% of bolus out BLA	Total innervation
31.11	M	CON	6	0	41900000		20200000	412900000	350800000		82.7196	15.04	743968
31.12	M	CON	6	0			18500000	447400000	428900000		101.136	4.135	2.39378e+06
31.27	M	CON	6	0	12200000	7280000	0	274380000	254900000		60.1061	7.09964	1356514
3128	M	CON	3	1	25800000	16800000	0	344400000	301800000	very little with bolus	71.1653	12.3693	687978
31.41	M	CON	5	0			0	259000000	259000000		61.0729	0	527338
31.43	M	CON	3	2			0	257700000	257700000		60.7664	0	2.0247e+06
31.55	M	CON	4	0	1300000		29400000	285800000	255100000		60.1533	10.7418	1.57743e+06
31.7	M	CON	4	1	1600000	1800000	9180000	487780000	475200000		112.053	2.57903	1.50373e+06
31.02	M	ELS	6	0	50600000		0	429700000	379100000		89.3928	11.7757	2.51363e+06
31.1	M	ELS	5	1	75000000		0	507000000	432000000		101.867	14.7929	1.32845e+06
31.25	M	ELS	4	1			30600000	327200000	296600000		69.9391	9.35208	1441523
31.26	M	ELS	6	0	42000000		0	307600000	265600000		62.6292	13.6541	1.4055e+06
31.33	M	ELS	5	1	720000		10860000	381780000	370200000	BLP	87.2942	3.03316	3742402
31.34	M	ELS	5	0	12600000		35500000	316900000	268800000	very far back	63.3838	15.1783	4.09077e+06
31.59	M	ELS					0	291800000	291800000		68.8072	0	2003042
31.15	F	CON	6	0	15500000	49500000	0	487700000	422700000		99.6738	13.3279	1553989
31.16	F	CON	5	0	26400000		63600000	690600000	600600000		141.623	13.0321	877674
31.32	F	CON	6	0			26500000	392200000	365700000		86.2331	6.75676	2.43439e+06
31.07	F	CON	6	0		34200000	34900000	490460000	421360000		99.3578	14.0888	857937
31.49	F	CON	6	0			0	276800000	276800000		65.2702	0	1.14529e+06
31.53	F	CON	5	0			0	276100000	276100000		65.1051	0	714662
31.63	F	CON	6	0	21600000		27600000	337800000	288600000		68.0527	14.5648	1362004
31.57	F	CON	4	2			0	336000000	336000000		79.2297	0	2.40072e+06
31.13	F	ELS	5	0	12080000		32400000	431380000	386900000		91.2321	10.3111	1.72203e+06
31.21	F	ELS	6	0	10940000		47500000	530040000	471600000		111.205	11.0256	2.24717e+06
31.22	F	ELS	5	1	9780000	16800000	74400000	358380000	257400000		60.6956	28.1768	1.6876e+06
31.35	F	ELS	4	1		46200000	0	315000000	268800000		63.3838	14.6667	2.53926e+06
31.67	F	ELS	6	0			17000000	383700000	366700000		86.4689	4.43054	1.10114e+06
31.69	F	ELS	6	0	12600000		12300000	411500000	386600000		91.1613	6.05103	510725

## Sheet: P41
Ave Volume:	4.90511e+08		Counted	Missing	Caudate	Central amygdala	Other	Total Bolus	BLA	Notes	% of BLA full	% of bolus out BLA	Total Innervation
41.19	M	CON	3	3	8040000	0	0	406440000	398400000	1st section a lot outside. Rest pretty tight.	81.2214	1.97815	1257139
41.2	M	CON	4	1	5340000	0	22500000	378840000	351000000		71.558	7.34875	1.45661e+06
41.28	M	CON	5	1	3360000		77400000	657360000	576600000		117.551	12.2855	2.00467e+06
41.83	M	CON	5	0	5059200		95084000	600335200	500192000		101.974	16.6812	1.70349e+06
41.81	M	CON	6	0	2016000	6177600	84752000	608321600	515376000	light stain	105.069	15.279	2.73465e+06
41.82	M	CON	6	0			73296000	498240000	424944000		86.6329	14.711	876926
41.88	M	CON	5	0	3500000		76000000	544300000	464800000		94.7583	14.6059	1520795
41.89	M	CON	6	0	6000000		5200000	362600000	351400000		71.6396	3.0888	513206
41.18	M	ELS	5	0			36100000	387600000	351500000		71.6599	9.31373	1282918
41.25	M	ELS	6	0			31400000	438800000	407400000		83.0562	7.15588	1.34457e+06
41.26	M	ELS	4	1	70001000	0	29200000	662001000	562800000	missing last slice	114.737	14.985	1424761
41.17	M	ELS	6	0	20000000		41300000	400000000	338700000		69.0504	15.325	1.46951e+06
41.45	M	ELS	4	2	10800000	0	28320000	441120000	402000000		81.9553	8.86834	2345329
41.79	M	ELS	5	0	10080000		33056000	493568000	450432000		91.8291	8.73963	808844
41.8	M	ELS	5	0			63728000	656720000	592992000		120.893	9.70398	993861
41.91	M	ELS	5	0	3840000		60100000	442140000	378200000		77.1032	14.4615	2.29504e+06
41.15	F	CON	5	0			53500000	666000000	612500000		124.87	8.03303	1.36636e+06
41.16	F	CON	3	2			1400000	442400000	441000000		89.9062	0.316456	679872
41.23	F	CON	3	2	0	0	13800000	441600000	427800000		87.2151	3.125	925422
41.24	F	CON	6	0	200000		35200000	478900000	443500000		90.4159	7.39194	2433185
41.31	F	CON	5	1	3960000	0	31040000	379400000	344400000		70.2125	9.22509	169555
41.64	F	CON	5	0	1200000		45500000	469900000	423200000		86.2774	9.93828	426968
41.73	F	CON	5	0			13130000	519930000	506800000		103.321	2.52534	1.48688e+06
41.13	F	ELS	5	1	53140000	1860000	0	394600000	339600000	Great bolus in the beginning. To the left of BLA at the end	69.2339	13.9382	1669912
41.29	F	ELS	6	0		74500000	27500000	663500000	561500000		114.472	15.373	2.0027e+06
41.3	F	ELS	6	0	8700000	60600000	11220000	591120000	510600000	Great Hit!	104.096	13.6216	3.9052e+06
41.59	F	ELS	5	1			59800000	458000000	398200000		81.1806	13.0568	2.40437e+06
41.77	F	ELS	4	2			11500000	330300000	318800000		64.9934	3.48168	721233
41.76	F	ELS	6	0	16500000		4700000	501700000	480500000		97.959	4.22563	2.82846e+06
41.75	F	ELS	6	0	38500000		33400000	547200000	475300000		96.8989	13.1396	3535976
41.74	F	ELS	5	0			2000000	359700000	357700000		72.9239	0.556019	2203465
41.85	F	ELS	5	0			57088000	593056000	535968000		109.267	9.62607	1.0432e+06
