# Supplementary material for: Altered corticolimbic connectivity reveals sex-specific adolescent outcomes in a rat model of early life adversity
Source: eLife. 2020 Jan 20;9:e52651. doi: 10.7554/eLife.52651 (PMC7010412; doi:10.7554/eLife.52651)
Supplement: Figure 2—source data 1. [file elife-52651-fig2-data1.xlsx]

## Sheet: P21
	Data File	Marker	Total Markers Counted	Markers Counted as Half Counts	Adjusted Marker Count	Number of Sections	Region	Number of Sampling Sites	User Defined Mounted Thickness	Measured Defined Mounted Thickness	Estimated Length by Spaceballsµm	Coefficient of Error (Gundersen), m=0	Coefficient of Error (Gundersen), m=1	Probe Shape	Probe Volume (µm³)	Sampling Grid Area (XY) (µm²)
M CON	2103.DAT	Marker 1	13	0	13	3	PL5	214	0	16.1	48016.8	0.39	0.28	Hemisphere	193396	12000
	2103.DAT	Marker 2	3	0	3	3	IL5	214	0	16.1	11080.8	0.71	0.58	Hemisphere	193396	12000
	2103.DAT	Marker 3	26	0	26	3	PL2	214	0	16.1	96033.5	0.33	0.2	Hemisphere	193396	12000
	2103.DAT	Marker 4	5	0	5	3	IL2	214	0	16.1	18468	0.47	0.45	Hemisphere	193396	12000
	2103.DAT	All Markers	47	0	47	3		214	0	16.1	173599	0.31	0.16	Hemisphere	193396	12000
M CON	2111.DAT	Marker 1	42	0	42	3	PL5	212	0	16.9	162654	0.18	0.16	Hemisphere	202774	12000
	2111.DAT	Marker 2	34	0	34	3	IL5	212	0	16.9	131672	0.31	0.18	Hemisphere	202774	12000
	2111.DAT	Marker 3	31	2	30	3	PL2	212	0	16.9	116181	0.2	0.18	Hemisphere	202774	12000
	2111.DAT	Marker 4	21	0	21	3	IL2	212	0	16.9	81326.9	0.23	0.22	Hemisphere	202774	12000
	2111.DAT	All Markers	128	2	127	3		212	0	16.9	491834	0.15	0.09	Hemisphere	202774	12000
F CON	2116.DAT	Marker 1	103	0	103	3	PL5	207	0	14	331463	0.15	0.1	Hemisphere	168499	12000
	2116.DAT	Marker 2	53	0	53	3	IL5	207	0	14	170559	0.21	0.14	Hemisphere	168499	12000
	2116.DAT	Marker 3	103	0	103	3	PL2	207	0	14	331463	0.22	0.11	Hemisphere	168499	12000
	2116.DAT	Marker 4	22	0	22	3	IL2	207	0	14	70797.9	0.28	0.22	Hemisphere	168499	12000
	2116.DAT	All Markers	281	0	281	3		207	0	14	904282	0.17	0.07	Hemisphere	168499	12000
M ELS	2117.DAT	Marker 1	67	0	67	3	PL5	220	0	18.7	287007	0.17	0.12	Hemisphere	224294	12000
	2117.DAT	Marker 2	85	0	85	3	IL5	220	0	18.7	364114	0.17	0.11	Hemisphere	224294	12000
	2117.DAT	Marker 3	92	0	92	3	PL2	220	0	18.7	394100	0.38	0.13	Hemisphere	224294	12000
	2117.DAT	Marker 4	92	0	92	3	IL2	220	0	18.7	394100	0.28	0.12	Hemisphere	224294	12000
	2117.DAT	All Markers	336	0	336	3		220	0	18.7	1.43932e+06	0.18	0.07	Hemisphere	224294	12000
M CON	2119.DAT	Marker 1	9	0	9	3	PL5	174	0	15.4	31674.1	0.36	0.33	Hemisphere	184272	12000
	2119.DAT	Marker 2	13	0	13	3	IL5	174	0	15.4	45751.5	0.31	0.28	Hemisphere	184272	12000
	2119.DAT	Marker 3	12	0	12	3	PL2	174	0	15.4	42232.1	0.28	0.29	Hemisphere	184272	12000
	2119.DAT	Marker 4	3	0	3	3	IL2	174	0	15.4	10558	0.64	0.58	Hemisphere	184272	12000
	2119.DAT	All Markers	37	0	37	3		174	0	15.4	130216	0.22	0.17	Hemisphere	184272	12000
F ELS	2122.DAT	Marker 1	446	3	444.5	3	PL5	204	0	16.1	1.63719e+06	0.18	0.06	Hemisphere	192853	12000
	2122.DAT	Marker 2	151	2	150	3	IL5	204	0	16.1	552483	0.19	0.09	Hemisphere	192853	12000
	2122.DAT	Marker 3	282	9	277.5	3	PL2	204	0	16.1	1.02209e+06	0.14	0.07	Hemisphere	192853	12000
	2122.DAT	Marker 4	45	0	45	3	IL2	204	0	16.1	165745	0.21	0.15	Hemisphere	192853	12000
	2122.DAT	All Markers	924	14	917	3		204	0	16.1	3377513	0.15	0.05	Hemisphere	192853	12000
F CON	2123.DAT	Marker 1	163	1	162.5	3	PL5	217	0	16.1	599206	0.19	0.09	Hemisphere	193073	12000
	2123.DAT	Marker 2	81	0	81	3	IL5	217	0	16.1	298681	0.17	0.11	Hemisphere	193073	12000
	2123.DAT	Marker 3	90	0	90	3	PL2	217	0	16.1	331868	0.15	0.11	Hemisphere	193073	12000
	2123.DAT	Marker 4	31	0	31	3	IL2	217	0	16.1	114310	0.23	0.18	Hemisphere	193073	12000
	2123.DAT	All Markers	365	1	364.5	3		217	0	16.1	1.34406e+06	0.14	0.06	Hemisphere	193073	12000
F CON	2124.DAT	Marker 1	96	0	96	3	PL5	262	0	13.6	300082	0.17	0.11	Hemisphere	163669	12000
	2124.DAT	Marker 2	40	0	40	3	IL5	262	0	13.6	125034	0.18	0.16	Hemisphere	163669	12000
	2124.DAT	Marker 3	202	0	202	3	PL2	262	0	13.6	631423	0.19	0.08	Hemisphere	163669	12000
	2124.DAT	Marker 4	22	0	22	3	IL2	262	0	13.6	68768.8	0.25	0.22	Hemisphere	163669	12000
	2124.DAT	All Markers	360	0	360	3		262	0	13.6	1.12531e+06	0.16	0.06	Hemisphere	163669	12000
M CON	2187.DAT	Marker 1	91	0	91	3	PL5	199	0	14.7	307076	0.18	0.11	Hemisphere	176686	12000
	2187.DAT	Marker 2	22	0	22	3	IL5	199	0	14.7	74238.1	0.25	0.21	Hemisphere	176686	12000
	2187.DAT	Marker 3	99	2	98	3	PL2	199	0	14.7	330697	0.19	0.11	Hemisphere	176686	12000
	2187.DAT	Marker 4	11	0	11	3	IL2	199	0	14.7	37119.1	0.41	0.31	Hemisphere	176686	12000
	2187.DAT	All Markers	223	2	222	3		199	0	14.7	749130	0.17	0.08	Hemisphere	176686	12000
M CON	2188.DAT	Marker 1	242	0	242	3	PL5	177	0	12.7	704465	0.15	0.07	Hemisphere	152420	12000
	2188.DAT	Marker 2	40	0	40	3	IL5	177	0	12.7	116441	0.19	0.16	Hemisphere	152420	12000
	2188.DAT	Marker 3	185	0	185	3	PL2	177	0	12.7	538538	0.15	0.08	Hemisphere	152420	12000
	2188.DAT	Marker 4	8	0	8	3	IL2	177	0	12.7	23288.1	0.5	0.36	Hemisphere	152420	12000
	2188.DAT	All Markers	475	0	475	3		177	0	12.7	1.38273e+06	0.14	0.05	Hemisphere	152420	12000
M ELS	2126.DAT	Marker 1	183	0	183	3	PL5	197	0	15	629842	0.19	0.08	Hemisphere	180210	12000
	2126.DAT	Marker 2	48	0	48	3	IL5	197	0	15	165204	0.2	0.15	Hemisphere	180210	12000
	2126.DAT	Marker 3	181	0	181	3	PL2	197	0	15	622958	0.17	0.08	Hemisphere	180210	12000
	2126.DAT	Marker 4	16	0	16	3	IL2	197	0	15	55068.2	0.26	0.25	Hemisphere	180210	12000
	2126.DAT	All Markers	428	0	428	3		197	0	15	1473073	0.16	0.06	Hemisphere	180210	12000
M CON	2129.DAT	Marker 1	183	0	183	3	PL5	218	0	15.9	667181	0.19	0.08	Hemisphere	190894	12000
	2129.DAT	Marker 2	33	0	33	3	IL5	218	0	15.9	120311	0.35	0.19	Hemisphere	190894	12000
	2129.DAT	Marker 3	275	0	275	3	PL2	218	0	15.9	1.00259e+06	0.13	0.07	Hemisphere	190894	12000
	2129.DAT	Marker 4	26	0	26	3	IL2	218	0	15.9	94790.8	0.23	0.2	Hemisphere	190894	12000
	2129.DAT	All Markers	517	0	517	3		218	0	15.9	1884878	0.15	0.05	Hemisphere	190894	12000
F ELS	2131.DAT	Marker 1	282	1	281.5	3	PL5	232	0	18.7	1.20754e+06	0.13	0.07	Hemisphere	224607	12000
	2131.DAT	Marker 2	194	0	194	3	IL5	232	0	18.7	832197	0.14	0.08	Hemisphere	224607	12000
	2131.DAT	Marker 3	153	0	153	3	PL2	232	0	18.7	656320	0.15	0.09	Hemisphere	224607	12000
	2131.DAT	Marker 4	79	0	79	3	IL2	232	0	18.7	338884	0.21	0.12	Hemisphere	224607	12000
	2131.DAT	All Markers	708	1	707.5	3		232	0	18.7	3034946	0.13	0.05	Hemisphere	224607	12000
F ELS	2135.DAT	Marker 1	151	0	151	3	PL5	201	0	18	623694	0.16	0.09	Hemisphere	216269	12000
	2135.DAT	Marker 2	112	0	112	3	IL5	201	0	18	462608	0.14	0.1	Hemisphere	216269	12000
	2135.DAT	Marker 3	91	0	91	3	PL2	201	0	18	375869	0.18	0.11	Hemisphere	216269	12000
	2135.DAT	Marker 4	63	0	63	3	IL2	201	0	18	260217	0.16	0.13	Hemisphere	216269	12000
	2135.DAT	All Markers	417	0	417	3		201	0	18	1.72239e+06	0.13	0.06	Hemisphere	216269	12000
M CON	2138.DAT	Marker 1	312	0	312	3	PL5	206	0	15.2	1.08691e+06	0.16	0.07	Hemisphere	182406	12000
	2138.DAT	Marker 2	97	0	97	3	IL5	206	0	15.2	337918	0.17	0.11	Hemisphere	182406	12000
	2138.DAT	Marker 3	165	0	165	3	PL2	206	0	15.2	574809	0.16	0.08	Hemisphere	182406	12000
	2138.DAT	Marker 4	34	0	34	3	IL2	206	0	15.2	118446	0.28	0.18	Hemisphere	182406	12000
	2138.DAT	All Markers	608	0	608	3		206	0	15.2	2.11809e+06	0.15	0.05	Hemisphere	182406	12000
M CON	2145.DAT	Marker 1	142	0	142	3	PL5	196	0	18.5	601109	0.27	0.1	Hemisphere	221648	12000
	2145.DAT	Marker 2	64	0	64	3	IL5	196	0	18.5	270922	0.19	0.13	Hemisphere	221648	12000
	2145.DAT	Marker 3	108	0	108	3	PL2	196	0	18.5	457182	0.15	0.1	Hemisphere	221648	12000
	2145.DAT	Marker 4	50	0	50	3	IL2	196	0	18.5	211658	0.3	0.15	Hemisphere	221648	12000
	2145.DAT	All Markers	364	0	364	3		196	0	18.5	1.54087e+06	0.18	0.07	Hemisphere	221648	12000
M CON	2147.DAT	Marker 1	301	0	301	3	PL5	176	0	17.1	1.18082e+06	0.15	0.07	Hemisphere	205408	12000
	2147.DAT	Marker 2	95	0	95	3	IL5	176	0	17.1	372685	0.15	0.11	Hemisphere	205408	12000
	2147.DAT	Marker 3	204	0	204	3	PL2	176	0	17.1	800292	0.17	0.08	Hemisphere	205408	12000
	2147.DAT	Marker 4	49	0	49	3	IL2	176	0	17.1	192227	0.17	0.14	Hemisphere	205408	12000
	2147.DAT	All Markers	649	0	649	3		176	0	17.1	2.54603e+06	0.14	0.05	Hemisphere	205408	12000
M CON	2168.DAT	Marker 1	191	0	191	3	PL5	227	0	16.8	734044	0.13	0.08	Hemisphere	201227	12000
	2168.DAT	Marker 2	119	0	119	3	IL5	227	0	16.8	457336	0.16	0.1	Hemisphere	201227	12000
	2168.DAT	Marker 3	31	0	31	3	PL2	227	0	16.8	119138	0.24	0.18	Hemisphere	201227	12000
	2168.DAT	Marker 4	30	0	30	3	IL2	227	0	16.8	115295	0.23	0.19	Hemisphere	201227	12000
	2168.DAT	All Markers	371	0	371	3		227	0	16.8	1.42581e+06	0.12	0.06	Hemisphere	201227	12000
M CON	2180.DAT	Marker 1	158	0	158	3	PL5	238	0	14.1	512027	0.15	0.08	Hemisphere	169681	12000
	2180.DAT	Marker 2	44	0	44	3	IL5	238	0	14.1	142590	0.18	0.15	Hemisphere	169681	12000
	2180.DAT	Marker 3	193	0	193	3	PL2	238	0	14.1	625451	0.14	0.08	Hemisphere	169681	12000
	2180.DAT	Marker 4	5	0	5	3	IL2	238	0	14.1	16203.4	0.52	0.45	Hemisphere	169681	12000
	2180.DAT	All Markers	400	0	400	3		238	0	14.1	1.29627e+06	0.13	0.06	Hemisphere	169681	12000
M ELS	2151.DAT	Marker 1	141	0	141	3	PL5	154	0	17.7	570649	0.24	0.1	Hemisphere	211909	12000
	2151.DAT	Marker 2	43	0	43	3	IL5	154	0	17.7	174028	0.41	0.18	Hemisphere	211909	12000
	2151.DAT	Marker 3	61	0	61	3	PL2	154	0	17.7	246877	0.17	0.13	Hemisphere	211909	12000
	2151.DAT	Marker 4	16	0	16	3	IL2	154	0	17.7	64754.5	0.37	0.26	Hemisphere	211909	12000
	2151.DAT	All Markers	261	0	261	3		154	0	17.7	1.05631e+06	0.19	0.07	Hemisphere	211909	12000
M ELS	2172.DAT	Marker 1	131	0	131	3	PL5	216	0	15.2	455668	0.14	0.09	Hemisphere	182128	12000
	2172.DAT	Marker 2	39	0	39	3	IL5	216	0	15.2	135657	0.19	0.16	Hemisphere	182128	12000
	2172.DAT	Marker 3	195	0	195	3	PL2	216	0	15.2	678285	0.19	0.08	Hemisphere	182128	12000
	2172.DAT	Marker 4	19	0	19	3	IL2	216	0	15.2	66089.3	0.29	0.23	Hemisphere	182128	12000
	2172.DAT	All Markers	384	0	384	3		216	0	15.2	1.3357e+06	0.16	0.06	Hemisphere	182128	12000
M ELS	2173.DAT	Marker 1	156	0	156	3	PL5	203	0	16.5	589477	0.22	0.09	Hemisphere	197852	12000
	2173.DAT	Marker 2	39	0	39	3	IL5	203	0	16.5	147369	0.35	0.17	Hemisphere	197852	12000
	2173.DAT	Marker 3	191	0	191	3	PL2	203	0	16.5	721732	0.19	0.08	Hemisphere	197852	12000
	2173.DAT	Marker 4	22	0	22	3	IL2	203	0	16.5	83131.4	0.22	0.21	Hemisphere	197852	12000
	2173.DAT	All Markers	408	0	408	3		203	0	16.5	1.54171e+06	0.2	0.07	Hemisphere	197852	12000
M ELS	2174.DAT	Marker 1	126	0	126	3	PL5	224	0	14.7	423816	0.24	0.1	Hemisphere	176119	12000
	2174.DAT	Marker 2	34	0	34	3	IL5	224	0	14.7	114363	0.23	0.17	Hemisphere	176119	12000
	2174.DAT	Marker 3	168	0	168	3	PL2	224	0	14.7	565088	0.19	0.09	Hemisphere	176119	12000
	2174.DAT	Marker 4	7	0	7	3	IL2	224	0	14.7	23545.3	0.52	0.39	Hemisphere	176119	12000
	2174.DAT	All Markers	335	0	335	3		224	0	14.7	1.12681e+06	0.2	0.07	Hemisphere	176119	12000
M ELS	2182.DAT	Marker 1	57	0	57	3	PL5	183	0	12	157079	0.19	0.14	Hemisphere	144292	12000
	2182.DAT	Marker 2	12	0	12	3	IL5	183	0	12	33069.2	0.36	0.29	Hemisphere	144292	12000
	2182.DAT	Marker 3	14	0	14	3	PL2	183	0	12	38580.8	0.34	0.27	Hemisphere	144292	12000
	2182.DAT	Marker 4	4	0	4	3	IL2	183	0	12	11023.1	0.66	0.51	Hemisphere	144292	12000
	2182.DAT	All Markers	87	0	87	3		183	0	12	239752	0.16	0.11	Hemisphere	144292	12000
M ELS	2183.DAT	Marker 1	260	3	258.5	3	PL5	208	0	13.9	825896	0.13	0.07	Hemisphere	167287	12000
	2183.DAT	Marker 2	57	0	57	3	IL5	208	0	13.9	182112	0.17	0.13	Hemisphere	167287	12000
	2183.DAT	Marker 3	229	2	228	3	PL2	208	0	13.9	728450	0.13	0.07	Hemisphere	167287	12000
	2183.DAT	Marker 4	14	1	13.5	3	IL2	208	0	13.9	43131.9	0.37	0.27	Hemisphere	167287	12000
	2183.DAT	All Markers	560	6	557	3		208	0	13.9	1.77959e+06	0.12	0.05	Hemisphere	167287	12000
F CON	2124.DAT	Marker 1	96	0	96	3	PL5	262	0	13.6	300082	0.17	0.11	Hemisphere	163669	12000
	2124.DAT	Marker 2	40	0	40	3	IL5	262	0	13.6	125034	0.18	0.16	Hemisphere	163669	12000
	2124.DAT	Marker 3	202	0	202	3	PL2	262	0	13.6	631423	0.19	0.08	Hemisphere	163669	12000
	2124.DAT	Marker 4	22	0	22	3	IL2	262	0	13.6	68768.8	0.25	0.22	Hemisphere	163669	12000
	2124.DAT	All Markers	360	0	360	3		262	0	13.6	1.12531e+06	0.16	0.06	Hemisphere	163669	12000
F CON	2143.DAT	Marker 1	44	0	44	3	PL5	230	0	17.8	179316	0.25	0.16	Hemisphere	213386	12000
	2143.DAT	Marker 2	25	0	25	3	IL5	230	0	17.8	101884	0.31	0.21	Hemisphere	213386	12000
	2143.DAT	Marker 3	21	0	21	3	PL2	230	0	17.8	85582.9	0.29	0.22	Hemisphere	213386	12000
	2143.DAT	Marker 4	10	0	10	3	IL2	230	0	17.8	40753.7	0.4	0.32	Hemisphere	213386	12000
	2143.DAT	All Markers	100	0	100	3		230	0	17.8	407537	0.25	0.11	Hemisphere	213386	12000
F CON	2177.DAT	Marker 1	91	0	91	3	PL5	227	0	13.8	286889	0.19	0.11	Hemisphere	165071	12000
	2177.DAT	Marker 2	21	0	21	3	IL5	227	0	13.8	66205.2	0.28	0.22	Hemisphere	165071	12000
	2177.DAT	Marker 3	80	0	80	3	PL2	227	0	13.8	252210	0.16	0.11	Hemisphere	165071	12000
	2177.DAT	Marker 4	15	0	15	3	IL2	227	0	13.8	47289.5	0.29	0.26	Hemisphere	165071	12000
	2177.DAT	All Markers	207	0	207	3		227	0	13.8	652595	0.14	0.07	Hemisphere	165071	12000
F CON	2189.DAT	Marker 1	168	0	168	3	PL5	186	0	12.6	486377	0.18	0.08	Hemisphere	151587	12000
	2189.DAT	Marker 2	53	0	53	3	IL5	186	0	12.6	153440	0.17	0.14	Hemisphere	151587	12000
	2189.DAT	Marker 3	135	0	135	3	PL2	186	0	12.6	390838	0.16	0.09	Hemisphere	151587	12000
	2189.DAT	Marker 4	11	0	11	3	IL2	186	0	12.6	31846.1	0.28	0.3	Hemisphere	151587	12000
	2189.DAT	All Markers	367	0	367	3		186	0	12.6	1.0625e+06	0.15	0.06	Hemisphere	151587	12000
F CON	2190.DAT	Marker 1	290	0	290	3	PL5	223	0	12.6	839894	0.17	0.07	Hemisphere	151644	12000
	2190.DAT	Marker 2	55	0	55	3	IL5	223	0	12.6	159290	0.19	0.14	Hemisphere	151644	12000
	2190.DAT	Marker 3	231	0	231	3	PL2	223	0	12.6	669019	0.14	0.07	Hemisphere	151644	12000
	2190.DAT	Marker 4	6	0	6	3	IL2	223	0	12.6	17377.1	0.41	0.41	Hemisphere	151644	12000
	2190.DAT	All Markers	582	0	582	3		223	0	12.6	1685580	0.15	0.05	Hemisphere	151644	12000
F ELS	2153.DAT	Marker 1	331	0	331	3	PL5	164	0	15.5	1.17952e+06	0.19	0.07	Hemisphere	186585	12000
	2153.DAT	Marker 2	78	0	78	3	IL5	164	0	15.5	277954	0.17	0.12	Hemisphere	186585	12000
	2153.DAT	Marker 3	141	0	141	3	PL2	164	0	15.5	502456	0.17	0.09	Hemisphere	186585	12000
	2153.DAT	Marker 4	47	0	47	3	IL2	164	0	15.5	167485	0.22	0.15	Hemisphere	186585	12000
	2153.DAT	All Markers	597	0	597	3		164	0	15.5	2.12742e+06	0.17	0.05	Hemisphere	186585	12000
F ELS	2161.DAT	Marker 1	227	0	227	3	PL5	198	0	15	778687	0.22	0.08	Hemisphere	179612	12000
	2161.DAT	Marker 2	67	0	67	3	IL5	198	0	15	229833	0.16	0.12	Hemisphere	179612	12000
	2161.DAT	Marker 3	188	0	188	3	PL2	198	0	15	644904	0.13	0.08	Hemisphere	179612	12000
	2161.DAT	Marker 4	41	0	41	3	IL2	198	0	15	140644	0.23	0.16	Hemisphere	179612	12000
	2161.DAT	All Markers	523	0	523	3		198	0	15	1.79407e+06	0.15	0.05	Hemisphere	179612	12000
F ELS	2154.DAT	Marker 1	428	0	428	3	PL5	187	0	17.2	1.68752e+06	0.15	0.06	Hemisphere	206445	12000
	2154.DAT	Marker 2	107	0	107	3	IL5	187	0	17.2	421880	0.22	0.11	Hemisphere	206445	12000
	2154.DAT	Marker 3	422	0	422	3	PL2	187	0	17.2	1.66386e+06	0.15	0.06	Hemisphere	206445	12000
	2154.DAT	Marker 4	41	0	41	3	IL2	187	0	17.2	161655	0.33	0.17	Hemisphere	206445	12000
	2154.DAT	All Markers	998	0	998	3		187	0	17.2	3934921	0.15	0.05	Hemisphere	206445	12000
F ELS	2185.DAT	Marker 1	294	0	294	3	PL5	181	0	13.5	908864	0.17	0.07	Hemisphere	161864	12000
	2185.DAT	Marker 2	65	2	64	3	IL5	181	0	13.5	197848	0.24	0.13	Hemisphere	161864	12000
	2185.DAT	Marker 3	207	0	207	3	PL2	181	0	13.5	639915	0.13	0.07	Hemisphere	161864	12000
	2185.DAT	Marker 4	51	0	51	3	IL2	181	0	13.5	157660	0.22	0.15	Hemisphere	161864	12000
	2185.DAT	All Markers	617	2	616	3		181	0	13.5	1.90429e+06	0.15	0.05	Hemisphere	161864	12000

## Sheet: P31
	Data File	Marker	Total Markers Counted	Markers Counted as Half Counts	Adjusted Marker Count	Number of Sections	Region	Number of Sampling Sites	User Defined Mounted Thickness	Measured Defined Mounted Thickness	Estimated Length by Spaceballsµm	Coefficient of Error (Gundersen), m=0	Coefficient of Error (Gundersen), m=1	Probe Shape	Probe Volume (µm³)	Sampling Grid Area (XY) (µm²)
M ELS	3102.DAT	Marker 1	224	0	224	3	PL5	206	0	16.1	824383	0.18	0.08	Hemisphere	192699	12000
	3102.DAT	Marker 2	158	0	158	3	IL5	206	0	16.1	581484	0.18	0.09	Hemisphere	192699	12000
	3102.DAT	Marker 3	215	0	215	3	PL2	206	0	16.1	791260	0.15	0.07	Hemisphere	192699	12000
	3102.DAT	Marker 4	86	0	86	3	IL2	206	0	16.1	316504	0.16	0.11	Hemisphere	192699	12000
	3102.DAT	All Markers	683	0	683	3		206	0	16.1	2.51363e+06	0.15	0.05	Hemisphere	192699	12000
M ELS	3110.DAT	Marker 1	62	0	62	3	PL5	239	0	17.7	251110	0.19	0.13	Hemisphere	212066	12000
	3110.DAT	Marker 2	56	0	56	3	IL5	239	0	17.7	226809	0.21	0.14	Hemisphere	212066	12000
	3110.DAT	Marker 3	175	0	175	3	PL2	239	0	17.7	708779	0.18	0.08	Hemisphere	212066	12000
	3110.DAT	Marker 4	35	0	35	3	IL2	239	0	17.7	141756	0.37	0.18	Hemisphere	212066	12000
	3110.DAT	All Markers	328	0	328	3		239	0	17.7	1.32845e+06	0.18	0.07	Hemisphere	212066	12000
M CON	3111.DAT	Marker 1	126	0	126	3	PL5	226	0	14.9	430000	0.13	0.09	Hemisphere	178688	12000
	3111.DAT	Marker 2	47	0	47	3	IL5	226	0	14.9	160397	0.25	0.15	Hemisphere	178688	12000
	3111.DAT	Marker 3	35	0	35	3	PL2	226	0	14.9	119444	0.2	0.17	Hemisphere	178688	12000
	3111.DAT	Marker 4	10	0	10	3	IL2	226	0	14.9	34127	0.41	0.32	Hemisphere	178688	12000
	3111.DAT	All Markers	218	0	218	3		226	0	14.9	743968	0.13	0.07	Hemisphere	178688	12000
F ELS	3113.DAT	Marker 1	182	0	182	3	PL5	217	0	16	665411	0.15	0.08	Hemisphere	191433	12000
	3113.DAT	Marker 2	82	0	82	3	IL5	217	0	16	299801	0.16	0.11	Hemisphere	191433	12000
	3113.DAT	Marker 3	184	0	184	3	PL2	217	0	16	672723	0.14	0.08	Hemisphere	191433	12000
	3113.DAT	Marker 4	23	0	23	3	IL2	217	0	16	84090.4	0.26	0.21	Hemisphere	191433	12000
	3113.DAT	All Markers	471	0	471	3		217	0	16	1.72203e+06	0.14	0.05	Hemisphere	191433	12000
F CON	3115.DAT	Marker 1	65	0	65	3	PL5	220	0	20.2	300623	0.36	0.15	Hemisphere	242163	12000
	3115.DAT	Marker 2	121	0	121	3	IL5	220	0	20.2	559621	0.17	0.1	Hemisphere	242163	12000
	3115.DAT	Marker 3	86	0	86	3	PL2	220	0	20.2	397747	0.19	0.11	Hemisphere	242163	12000
	3115.DAT	Marker 4	64	0	64	3	IL2	220	0	20.2	295998	0.28	0.14	Hemisphere	242163	12000
	3115.DAT	All Markers	336	0	336	3		220	0	20.2	1553989	0.21	0.07	Hemisphere	242163	12000
F CON	3116.DAT	Marker 1	49	4	47	3	PL5	216	0	19.8	213734	0.2	0.15	Hemisphere	238108	12000
	3116.DAT	Marker 2	53	10	48	3	IL5	216	0	19.8	218282	0.23	0.14	Hemisphere	238108	12000
	3116.DAT	Marker 3	69	2	68	3	PL2	216	0	19.8	309232	0.21	0.13	Hemisphere	238108	12000
	3116.DAT	Marker 4	31	2	30	3	IL2	216	0	19.8	136426	0.2	0.18	Hemisphere	238108	12000
	3116.DAT	All Markers	202	18	193	3		216	0	19.8	877674	0.16	0.08	Hemisphere	238108	12000
M CON	3120.DAT	Marker 1	27	0	27	3	PL5	271	0	14.8	91299.6	0.26	0.2	Hemisphere	177053	12000
	3120.DAT	Marker 2	35	0	35	3	IL5	271	0	14.8	118351	0.24	0.17	Hemisphere	177053	12000
	3120.DAT	Marker 3	18	0	18	3	PL2	271	0	14.8	60866.4	0.25	0.24	Hemisphere	177053	12000
	3120.DAT	Marker 4	17	0	17	3	IL2	271	0	14.8	57484.9	0.25	0.24	Hemisphere	177053	12000
	3120.DAT	All Markers	97	0	97	3		271	0	14.8	328002	0.17	0.11	Hemisphere	177053	12000
F ELS	3121.DAT	Marker 1	143	0	143	3	PL5	284	0	17.7	580045	0.26	0.1	Hemisphere	212385	12000
	3121.DAT	Marker 2	169	0	169	3	IL5	284	0	17.7	685508	0.13	0.08	Hemisphere	212385	12000
	3121.DAT	Marker 3	159	2	158	3	PL2	284	0	17.7	640889	0.26	0.1	Hemisphere	212385	12000
	3121.DAT	Marker 4	84	0	84	3	IL2	284	0	17.7	340726	0.19	0.11	Hemisphere	212385	12000
	3121.DAT	All Markers	555	2	554	3		284	0	17.7	2.24717e+06	0.19	0.06	Hemisphere	212385	12000
F ELS	3122.DAT	Marker 1	176	0	176	3	PL5	224	0	15.2	611148	0.22	0.09	Hemisphere	181816	12000
	3122.DAT	Marker 2	138	0	138	3	IL5	224	0	15.2	479195	0.16	0.09	Hemisphere	181816	12000
	3122.DAT	Marker 3	114	0	114	3	PL2	224	0	15.2	395857	0.15	0.1	Hemisphere	181816	12000
	3122.DAT	Marker 4	58	0	58	3	IL2	224	0	15.2	201401	0.2	0.14	Hemisphere	181816	12000
	3122.DAT	All Markers	486	0	486	3		224	0	15.2	1.6876e+06	0.16	0.06	Hemisphere	181816	12000
M ELS	3125.DAT	Marker 1	199	2	198	3	PL5	230	0	15.2	689424	0.14	0.08	Hemisphere	182314	12000
	3125.DAT	Marker 2	56	0	56	3	IL5	230	0	15.2	194989	0.17	0.14	Hemisphere	182314	12000
	3125.DAT	Marker 3	134	0	134	3	PL2	230	0	15.2	466580	0.17	0.09	Hemisphere	182314	12000
	3125.DAT	Marker 4	26	0	26	3	IL2	230	0	15.2	90530.4	0.38	0.21	Hemisphere	182314	12000
	3125.DAT	All Markers	415	2	414	3		230	0	15.2	1441523	0.14	0.06	Hemisphere	182314	12000
M CON	3127.DAT	Marker 1	186	0	186	3	PL5	230	0	15	640385	0.19	0.08	Hemisphere	180271	12000
	3127.DAT	Marker 2	47	0	47	3	IL5	230	0	15	161818	0.2	0.15	Hemisphere	180271	12000
	3127.DAT	Marker 3	137	0	137	3	PL2	230	0	15	471681	0.15	0.09	Hemisphere	180271	12000
	3127.DAT	Marker 4	24	0	24	3	IL2	230	0	15	82630.3	0.31	0.21	Hemisphere	180271	12000
	3127.DAT	All Markers	394	0	394	3		230	0	15	1356514	0.15	0.06	Hemisphere	180271	12000
	3128.DAT	Marker 1	83	0	83	3	PL5	220	0	15.1	286946	0.15	0.11	Hemisphere	181017	12000
M CON	3128.DAT	Marker 2	27	0	27	3	IL5	220	0	15.1	93343.7	0.26	0.2	Hemisphere	181017	12000
	3128.DAT	Marker 3	79	0	79	3	PL2	220	0	15.1	273117	0.19	0.12	Hemisphere	181017	12000
	3128.DAT	Marker 4	10	0	10	3	IL2	220	0	15.1	34571.8	0.44	0.32	Hemisphere	181017	12000
	3128.DAT	All Markers	199	0	199	3		220	0	15.1	687978	0.13	0.07	Hemisphere	181017	12000
F CON	3132.DAT	Marker 1	290	0	290	3	PL5	214	0	13.2	876987	0.16	0.07	Hemisphere	158341	12000
	3132.DAT	Marker 2	86	0	86	3	IL5	214	0	13.2	260072	0.16	0.11	Hemisphere	158341	12000
	3132.DAT	Marker 3	387	0	387	3	PL2	214	0	13.2	1.17032e+06	0.12	0.06	Hemisphere	158341	12000
	3132.DAT	Marker 4	42	0	42	3	IL2	214	0	13.2	127012	0.23	0.16	Hemisphere	158341	12000
	3132.DAT	All Markers	805	0	805	3		214	0	13.2	2.43439e+06	0.13	0.04	Hemisphere	158341	12000
F CON	3107.DAT	Marker 1	110	0	110	3	PL5	226	0	15.3	385196	0.19	0.1	Hemisphere	183353	12000
	3107.DAT	Marker 2	15	0	15	3	IL5	226	0	15.3	52526.8	0.32	0.26	Hemisphere	183353	12000
	3107.DAT	Marker 3	111	0	111	3	PL2	226	0	15.3	388698	0.15	0.1	Hemisphere	183353	12000
	3107.DAT	Marker 4	9	0	9	3	IL2	226	0	15.3	31516.1	0.5	0.34	Hemisphere	183353	12000
	3107.DAT	All Markers	245	0	245	3		226	0	15.3	857937	0.15	0.07	Hemisphere	183353	12000
M ELS	3126.DAT	Marker 1	109	0	109	3	PL5	224	0	14.6	547142	0.17	0.1	Hemisphere	175219	12000
	3126.DAT	Marker 2	37	0	37	3	IL5	224	0	14.6	185727	0.26	0.17	Hemisphere	175219	12000
	3126.DAT	Marker 3	91	0	91	3	PL2	224	0	14.6	456788	0.16	0.11	Hemisphere	175219	12000
	3126.DAT	Marker 4	43	0	43	3	IL2	224	0	14.6	215845	0.3	0.16	Hemisphere	175219	12000
	3126.DAT	All Markers	280	0	280	3		224	0	14.6	1.4055e+06	0.18	0.07	Hemisphere	175219	12000
M ELS	3133.DAT	Marker 1	287	2	286	3	PL5	204	0	17.2	1.12785e+06	0.21	0.07	Hemisphere	206482	12000
	3133.DAT	Marker 2	170	2	169	3	IL5	204	0	17.2	666455	0.19	0.09	Hemisphere	206482	12000
	3133.DAT	Marker 3	381	0	381	3	PL2	204	0	17.2	1.50248e+06	0.17	0.06	Hemisphere	206482	12000
	3133.DAT	Marker 4	113	0	113	3	IL2	204	0	17.2	445618	0.2	0.1	Hemisphere	206482	12000
	3133.DAT	All Markers	951	4	949	3		204	0	17.2	3742402	0.18	0.05	Hemisphere	206482	12000
M ELS	3134.DAT	Marker 1	510	0	510	3	PL5	240	0	16.5	1.93354e+06	0.13	0.05	Hemisphere	198510	12000
	3134.DAT	Marker 2	103	0	103	3	IL5	240	0	16.5	390500	0.17	0.1	Hemisphere	198510	12000
	3134.DAT	Marker 3	392	6	389	3	PL2	240	0	16.5	1.4748e+06	0.16	0.06	Hemisphere	198510	12000
	3134.DAT	Marker 4	77	0	77	3	IL2	240	0	16.5	291927	0.21	0.12	Hemisphere	198510	12000
	3134.DAT	All Markers	1082	6	1079	3		240	0	16.5	4.09077e+06	0.14	0.04	Hemisphere	198510	12000
M CON	3141.DAT	Marker 1	50	0	50	3	PL5	197	0	18	205991	0.2	0.14	Hemisphere	215714	12000
	3141.DAT	Marker 2	47	0	47	3	IL5	197	0	18	193632	0.31	0.16	Hemisphere	215714	12000
	3141.DAT	Marker 3	27	0	27	3	PL2	197	0	18	111235	0.34	0.2	Hemisphere	215714	12000
	3141.DAT	Marker 4	4	0	4	3	IL2	197	0	18	16479.3	0.48	0.5	Hemisphere	215714	12000
	3141.DAT	All Markers	128	0	128	3		197	0	18	527338	0.23	0.1	Hemisphere	215714	12000
F CON	3149.DAT	Marker 1	128	0	128	3	PL5	195	0	16.5	485419	0.18	0.09	Hemisphere	198566	12000
	3149.DAT	Marker 2	98	0	98	3	IL5	195	0	16.5	371649	0.16	0.11	Hemisphere	198566	12000
	3149.DAT	Marker 3	43	0	43	3	PL2	195	0	16.5	163070	0.21	0.16	Hemisphere	198566	12000
	3149.DAT	Marker 4	33	0	33	3	IL2	195	0	16.5	125147	0.37	0.19	Hemisphere	198566	12000
	3149.DAT	All Markers	302	0	302	3		195	0	16.5	1.14529e+06	0.17	0.07	Hemisphere	198566	12000
M CON	3143.DAT	Marker 1	210	0	210	3	PL5	203	0	17.3	830442	0.19	0.08	Hemisphere	207056	12000
	3143.DAT	Marker 2	161	0	161	3	IL5	203	0	17.3	636672	0.16	0.09	Hemisphere	207056	12000
	3143.DAT	Marker 3	102	0	102	3	PL2	203	0	17.3	403358	0.21	0.11	Hemisphere	207056	12000
	3143.DAT	Marker 4	39	0	39	3	IL2	203	0	17.3	154225	0.21	0.16	Hemisphere	207056	12000
	3143.DAT	All Markers	512	0	512	3		203	0	17.3	2.0247e+06	0.17	0.06	Hemisphere	207056	12000
M CON	3155.DAT	Marker 1	174	1	173.5	3	PL5	217	0	17.3	686787	0.19	0.08	Hemisphere	207263	12000
	3155.DAT	Marker 2	56	0	56	3	IL5	217	0	17.3	221672	0.21	0.14	Hemisphere	207263	12000
	3155.DAT	Marker 3	146	0	146	3	PL2	217	0	17.3	577930	0.18	0.09	Hemisphere	207263	12000
	3155.DAT	Marker 4	23	0	23	3	IL2	217	0	17.3	91043.8	0.37	0.22	Hemisphere	207263	12000
	3155.DAT	All Markers	399	1	398.5	3		217	0	17.3	1.57743e+06	0.18	0.06	Hemisphere	207263	12000
M CON	3170.DAT	Marker 1	260	0	260	3	PL5	201	0	13.2	788246	0.13	0.07	Hemisphere	158740	12000
	3170.DAT	Marker 2	77	0	77	3	IL5	201	0	13.2	233442	0.18	0.12	Hemisphere	158740	12000
	3170.DAT	Marker 3	120	0	120	3	PL2	201	0	13.2	363806	0.14	0.09	Hemisphere	158740	12000
	3170.DAT	Marker 4	39	0	39	3	IL2	201	0	13.2	118237	0.19	0.16	Hemisphere	158740	12000
	3170.DAT	All Markers	496	0	496	3		201	0	13.2	1.50373e+06	0.13	0.05	Hemisphere	158740	12000
M ELS	3159.DAT	Marker 1	204	0	204	3	iL 2	221	0	15.3	715623	0.16	0.08	Hemisphere	183676	12000
	3159.DAT	Marker 2	93	0	93	3	iL 2	221	0	15.3	326240	0.22	0.11	Hemisphere	183676	12000
	3159.DAT	Marker 3	232	0	232	3	iL 2	221	0	15.3	813846	0.13	0.07	Hemisphere	183676	12000
	3159.DAT	Marker 4	42	0	42	3	iL 2	221	0	15.3	147334	0.28	0.16	Hemisphere	183676	12000
	3159.DAT	All Markers	571	0	571	3	iL 2	221	0	15.3	2003042	0.15	0.05	Hemisphere	183676	12000
F CON	3107.DAT	Marker 1	110	0	110	3	PL5	226	0	15.3	385196	0.19	0.1	Hemisphere	183353	12000
	3107.DAT	Marker 2	15	0	15	3	IL5	226	0	15.3	52526.8	0.32	0.26	Hemisphere	183353	12000
	3107.DAT	Marker 3	111	0	111	3	PL2	226	0	15.3	388698	0.15	0.1	Hemisphere	183353	12000
	3107.DAT	Marker 4	9	0	9	3	IL2	226	0	15.3	31516.1	0.5	0.34	Hemisphere	183353	12000
	3107.DAT	All Markers	245	0	245	3		226	0	15.3	857937	0.15	0.07	Hemisphere	183353	12000
F CON	3153.DAT	Marker 1	100	0	100	3	PL5	194	0	14.4	330862	0.17	0.1	Hemisphere	173239	12000
	3153.DAT	Marker 2	45	1	44.5	3	IL5	194	0	14.4	147234	0.17	0.15	Hemisphere	173239	12000
	3153.DAT	Marker 3	47	0	47	3	PL2	194	0	14.4	155505	0.22	0.15	Hemisphere	173239	12000
	3153.DAT	Marker 4	25	1	24.5	3	IL2	194	0	14.4	81061.3	0.23	0.2	Hemisphere	173239	12000
	3153.DAT	All Markers	217	2	216	3		194	0	14.4	714662	0.14	0.07	Hemisphere	173239	12000
F CON	3163.DAT	Marker 1	168	1	167.5	3	PL5	214	0	14.9	571769	0.23	0.09	Hemisphere	178733	12000
	3163.DAT	Marker 2	39	0	39	3	IL5	214	0	14.9	133128	0.28	0.17	Hemisphere	178733	12000
	3163.DAT	Marker 3	173	0	173	3	PL2	214	0	14.9	590543	0.23	0.09	Hemisphere	178733	12000
	3163.DAT	Marker 4	20	1	19.5	3	IL2	214	0	14.9	66564.1	0.37	0.23	Hemisphere	178733	12000
	3163.DAT	All Markers	400	2	399	3		214	0	14.9	1362004	0.23	0.07	Hemisphere	178733	12000
F CON	3157.DAT	Marker 1	278	0	278	3	PL5	199	0	18.4	1.16985e+06	0.13	0.07	Hemisphere	220336	12000
	3157.DAT	Marker 2	81	0	81	3	IL5	199	0	18.4	340856	0.19	0.12	Hemisphere	220336	12000
	3157.DAT	Marker 3	147	1	146.5	3	PL2	199	0	18.4	616487	0.18	0.09	Hemisphere	220336	12000
	3157.DAT	Marker 4	65	0	65	3	IL2	199	0	18.4	273527	0.22	0.13	Hemisphere	220336	12000
	3157.DAT	All Markers	571	1	570.5	3		199	0	18.4	2.40072e+06	0.12	0.05	Hemisphere	220336	12000
F CON	3149.DAT	Marker 1	128	0	128	3	PL5	195	0	16.5	485419	0.18	0.09	Hemisphere	198566	12000
	3149.DAT	Marker 2	98	0	98	3	IL5	195	0	16.5	371649	0.16	0.11	Hemisphere	198566	12000
	3149.DAT	Marker 3	43	0	43	3	PL2	195	0	16.5	163070	0.21	0.16	Hemisphere	198566	12000
	3149.DAT	Marker 4	33	0	33	3	IL2	195	0	16.5	125147	0.37	0.19	Hemisphere	198566	12000
	3149.DAT	All Markers	302	0	302	3		195	0	16.5	1.14529e+06	0.17	0.07	Hemisphere	198566	12000
F ELS	3135.DAT	Marker 1	312	4	310	3	PL5	179	0	15	1.06519e+06	0.23	0.07	Hemisphere	179913
	3135.DAT	Marker 2	105	0	105	3	IL5	179	0	15	360789	0.14	0.1	Hemisphere	179913
	3135.DAT	Marker 3	228	4	226	3	PL2	179	0	15	776554	0.16	0.07	Hemisphere	179913
	3135.DAT	Marker 4	98	0	98	3	IL2	179	0	15	336736	0.16	0.1	Hemisphere	179913
	3135.DAT	All Markers	743	8	739	3		179	0	15	2.53926e+06	0.16	0.05	Hemisphere	179913
F ELS	3167.DAT	Marker 1	151	0	151	3	PL5	193	0	14.5	502334	0.16	0.09	Hemisphere	174187	12000
	3167.DAT	Marker 2	49	0	49	3	IL5	193	0	14.5	163009	0.2	0.15	Hemisphere	174187	12000
	3167.DAT	Marker 3	113	0	113	3	PL2	193	0	14.5	375919	0.2	0.1	Hemisphere	174187	12000
	3167.DAT	Marker 4	18	0	18	3	IL2	193	0	14.5	59880.9	0.31	0.24	Hemisphere	174187	12000
	3167.DAT	All Markers	331	0	331	3		193	0	14.5	1.10114e+06	0.16	0.06	Hemisphere	174187	12000
F ELS	3169B.DAT	Marker 1	103	0	103	3	PL5	195	0	13.8	324720	0.22	0.11	Hemisphere	165071	12000
	3169B.DAT	Marker 2	17	0	17	3	IL5	195	0	13.8	53594.6	0.25	0.24	Hemisphere	165071	12000
	3169B.DAT	Marker 3	39	0	39	3	PL2	195	0	13.8	122952	0.21	0.16	Hemisphere	165071	12000
	3169B.DAT	Marker 4	3	0	3	3	IL2	195	0	13.8	9457.86	0.71	0.58	Hemisphere	165071	12000
	3169B.DAT	All Markers	162	0	162	3		195	0	13.8	510725	0.19	0.09	Hemisphere	165071	12000

## Sheet: P41
	Data File	Marker	Total Markers Counted	Markers Counted as Half Counts	Adjusted Marker Count	Number of Sections	Region	Number of Sampling Sites	User Defined Mounted Thickness	Measured Defined Mounted Thickness	Estimated Length by Spaceballsµm	Coefficient of Error (Gundersen), m=0	Coefficient of Error (Gundersen), m=1	Probe Shape	Probe Volume (µm³)	Sampling Grid Area (XY) (µm²)
F ELS	4105.DAT	Marker 1	85	3	83.5	3	PL5	271	0	15.9	304434	0.3	0.13	Hemisphere	190900	12000
	4105.DAT	Marker 2	100	0	100	3	IL5	271	0	15.9	364591	0.28	0.12	Hemisphere	190900	12000
	4105.DAT	Marker 3	105	0	105	3	PL2	271	0	15.9	382821	0.22	0.11	Hemisphere	190900	12000
	4105.DAT	Marker 4	53	0	53	3	IL2	271	0	15.9	193233	0.29	0.15	Hemisphere	190900	12000
	4105.DAT	All Markers	343	3	341.5	3		271	0	15.9	1.24508e+06	0.24	0.08	Hemisphere	190900	12000
F ELS	4113.DAT	Marker 1	97	0	97	3	PL5	259	0	16.4	364413	0.15	0.1	Hemisphere	196707	12000
	4113.DAT	Marker 2	168	0	168	3	IL5	259	0	16.4	631148	0.14	0.08	Hemisphere	196707	12000
	4113.DAT	Marker 3	77	0	77	3	PL2	259	0	16.4	289276	0.17	0.12	Hemisphere	196707	12000
	4113.DAT	Marker 4	103	1	102.5	3	IL2	259	0	16.4	385075	0.16	0.1	Hemisphere	196707	12000
	4113.DAT	All Markers	445	1	444.5	3		259	0	16.4	1669912	0.12	0.05	Hemisphere	196707	12000
F CON	4115.DAT	Marker 1	91	0	91	3	PL5	248	0	18.2	379661	0.2	0.11	Hemisphere	218451	12000
	4115.DAT	Marker 2	169	1	168.5	3	IL5	248	0	18.2	702999	0.14	0.08	Hemisphere	218451	12000
	4115.DAT	Marker 3	25	0	25	3	PL2	248	0	18.2	104303	0.23	0.2	Hemisphere	218451	12000
	4115.DAT	Marker 4	43	0	43	3	IL2	248	0	18.2	179400	0.2	0.16	Hemisphere	218451	12000
	4115.DAT	All Markers	328	1	327.5	3		248	0	18.2	1.36636e+06	0.15	0.06	Hemisphere	218451	12000
F CON	4116.DAT	Marker 1	45	0	45	3	PL5	222	0	17	175325	0.2	0.15	Hemisphere	204000	12000
	4116.DAT	Marker 2	97	1	96.5	3	IL5	222	0	17	375975	0.18	0.11	Hemisphere	204000	12000
	4116.DAT	Marker 3	7	0	7	3	PL2	222	0	17	27272.8	0.39	0.38	Hemisphere	204000	12000
	4116.DAT	Marker 4	26	0	26	3	IL2	222	0	17	101299	0.24	0.2	Hemisphere	204000	12000
	4116.DAT	All Markers	175	1	174.5	3		222	0	17	679872	0.14	0.08	Hemisphere	204000	12000
M ELS	4118.DAT	Marker 1	71	0	71	3	PL5	285	0	16.4	267118	0.23	0.13	Hemisphere	196990	12000
	4118.DAT	Marker 2	126	0	126	3	IL5	285	0	16.4	474040	0.24	0.1	Hemisphere	196990	12000
	4118.DAT	Marker 3	39	0	39	3	PL2	285	0	16.4	146727	0.26	0.17	Hemisphere	196990	12000
	4118.DAT	Marker 4	105	0	105	3	IL2	285	0	16.4	395033	0.2	0.1	Hemisphere	196990	12000
	4118.DAT	All Markers	341	0	341	3		285	0	16.4	1282918	0.2	0.07	Hemisphere	196990	12000
M CON	4120.DAT	Marker 1	83	0	83	3	PL5	269	0	21.3	405700	0.19	0.12	Hemisphere	255932	12000
	4120.DAT	Marker 2	101	0	101	3	IL5	269	0	21.3	493683	0.23	0.11	Hemisphere	255932	12000
	4120.DAT	Marker 3	72	0	72	3	PL2	269	0	21.3	351932	0.21	0.12	Hemisphere	255932	12000
	4120.DAT	Marker 4	42	0	42	3	IL2	269	0	21.3	205294	0.29	0.16	Hemisphere	255932	12000
	4120.DAT	All Markers	298	0	298	3		269	0	21.3	1.45661e+06	0.2	0.07	Hemisphere	255932	12000
F CON	4123.DAT	Marker 1	93	0	93	3	PL5	267	0	15	318756	0.16	0.11	Hemisphere	179463	12000
	4123.DAT	Marker 2	87	0	87	3	IL5	267	0	15	298192	0.17	0.11	Hemisphere	179463	12000
	4123.DAT	Marker 3	82	0	82	3	PL2	267	0	15	281054	0.18	0.12	Hemisphere	179463	12000
	4123.DAT	Marker 4	8	0	8	3	IL2	267	0	15	27419.9	0.42	0.36	Hemisphere	179463	12000
	4123.DAT	All Markers	270	0	270	3		267	0	15	925422	0.15	0.07	Hemisphere	179463	12000
F CON	4124.DAT	Marker 1	243	0	243	3	PL5	314	0	14.4	800086	0.15	0.07	Hemisphere	172397	12000
	4124.DAT	Marker 2	294	0	294	3	IL5	314	0	14.4	968006	0.18	0.07	Hemisphere	172397	12000
	4124.DAT	Marker 3	108	0	108	3	PL2	314	0	14.4	355594	0.16	0.1	Hemisphere	172397	12000
	4124.DAT	Marker 4	94	0	94	3	IL2	314	0	14.4	309498	0.22	0.11	Hemisphere	172397	12000
	4124.DAT	All Markers	739	0	739	3		314	0	14.4	2433185	0.15	0.05	Hemisphere	172397	12000
M ELS	4125.DAT	Marker 1	202	0	202	3	PL5	222	0	13.1	606256	0.13	0.07	Hemisphere	157146	12000
	4125.DAT	Marker 2	33	0	33	3	IL5	222	0	13.1	99041.8	0.22	0.18	Hemisphere	157146	12000
	4125.DAT	Marker 3	200	0	200	3	PL2	222	0	13.1	600253	0.13	0.08	Hemisphere	157146	12000
	4125.DAT	Marker 4	13	0	13	3	IL2	222	0	13.1	39016.4	0.27	0.28	Hemisphere	157146	12000
	4125.DAT	All Markers	448	0	448	3		222	0	13.1	1.34457e+06	0.12	0.05	Hemisphere	157146	12000
M ELS	4126.DAT	Marker 1	177	0	177	3	PL5	241	0	12.5	505376	0.21	0.09	Hemisphere	149500	12000
	4126.DAT	Marker 2	94	0	94	3	IL5	241	0	12.5	268392	0.2	0.11	Hemisphere	149500	12000
	4126.DAT	Marker 3	156	0	156	3	PL2	241	0	12.5	445416	0.19	0.09	Hemisphere	149500	12000
	4126.DAT	Marker 4	72	0	72	3	IL2	241	0	12.5	205577	0.18	0.12	Hemisphere	149500	12000
	4126.DAT	All Markers	499	0	499	3		241	0	12.5	1424761	0.18	0.06	Hemisphere	149500	12000
M CON	4128.DAT	Marker 1	310	0	310	3	PL5	225	0	12.3	875280	0.18	0.07	Hemisphere	147837	12000
	4128.DAT	Marker 2	100	0	100	3	IL5	225	0	12.3	282348	0.17	0.1	Hemisphere	147837	12000
	4128.DAT	Marker 3	242	0	242	3	PL2	225	0	12.3	683283	0.15	0.07	Hemisphere	147837	12000
	4128.DAT	Marker 4	58	0	58	3	IL2	225	0	12.3	163762	0.2	0.14	Hemisphere	147837	12000
	4128.DAT	All Markers	710	0	710	3		225	0	12.3	2.00467e+06	0.15	0.05	Hemisphere	147837	12000
F ELS	4129.DAT	Marker 1	279	0	279	3	PL5	212	0	14.6	935937	0.13	0.07	Hemisphere	175647	12000
	4129.DAT	Marker 2	59	0	59	3	IL5	212	0	14.6	197922	0.17	0.13	Hemisphere	175647	12000
	4129.DAT	Marker 3	241	0	241	3	PL2	212	0	14.6	808462	0.16	0.07	Hemisphere	175647	12000
	4129.DAT	Marker 4	18	0	18	3	IL2	212	0	14.6	60383.1	0.25	0.24	Hemisphere	175647	12000
	4129.DAT	All Markers	597	0	597	3		212	0	14.6	2.0027e+06	0.13	0.05	Hemisphere	175647	12000
F ELS	4130.DAT	Marker 1	523	0	523	3	PL5	231	0	15.8	1.89464e+06	0.14	0.05	Hemisphere	189681	12000
	4130.DAT	Marker 2	124	0	124	3	IL5	231	0	15.8	449206	0.16	0.09	Hemisphere	189681	12000
	4130.DAT	Marker 3	400	0	400	3	PL2	231	0	15.8	1.44905e+06	0.15	0.06	Hemisphere	189681	12000
	4130.DAT	Marker 4	31	0	31	3	IL2	231	0	15.8	112302	0.21	0.18	Hemisphere	189681	12000
	4130.DAT	All Markers	1078	0	1078	3		231	0	15.8	3.9052e+06	0.14	0.04	Hemisphere	189681	12000
M ELS	4145.DAT	Marker 1	235	0	235	3	PL5	229	0	17.9	961871	0.14	0.07	Hemisphere	214313	12000
	4145.DAT	Marker 2	127	0	127	3	IL5	229	0	17.9	519820	0.17	0.09	Hemisphere	214313	12000
	4145.DAT	Marker 3	144	0	144	3	PL2	229	0	17.9	589402	0.18	0.09	Hemisphere	214313	12000
	4145.DAT	Marker 4	67	0	67	3	IL2	229	0	17.9	274236	0.2	0.13	Hemisphere	214313	12000
	4145.DAT	All Markers	573	0	573	3		229	0	17.9	2345329	0.15	0.05	Hemisphere	214313	12000
M CON	4181.DAT	Marker 1	406	0	406	3	PL5	212	0	13.3	1236380	0.19	0.06	Hemisphere	159450	12000
	4181.DAT	Marker 2	91	0	91	3	IL5	212	0	13.3	277120	0.22	0.11	Hemisphere	159450	12000
	4181.DAT	Marker 3	343	0	343	3	PL2	212	0	13.3	1044528	0.15	0.06	Hemisphere	159450	12000
	4181.DAT	Marker 4	58	0	58	3	IL2	212	0	13.3	176626	0.27	0.14	Hemisphere	159450	12000
	4181.DAT	All Markers	898	0	898	3		212	0	13.3	2.73465e+06	0.17	0.05	Hemisphere	159450	12000
M CON	4182.DAT	Marker 1	164	0	164	3	PL5	216	0	12.7	476212	0.19	0.09	Hemisphere	152039	12000
	4182.DAT	Marker 2	19	0	19	3	IL5	216	0	12.7	55170.8	0.23	0.23	Hemisphere	152039	12000
	4182.DAT	Marker 3	108	0	108	3	PL2	216	0	12.7	313603	0.23	0.11	Hemisphere	152039	12000
	4182.DAT	Marker 4	11	0	11	3	IL2	216	0	12.7	31941	0.47	0.31	Hemisphere	152039	12000
	4182.DAT	All Markers	302	0	302	3		216	0	12.7	876926	0.19	0.07	Hemisphere	152039	12000
M CON	4183.DAT	Marker 1	266	0	266	3	PL5	185	0	13.5	823870	0.22	0.08	Hemisphere	162172	12000
	4183.DAT	Marker 2	115	0	115	3	IL5	185	0	13.5	356184	0.14	0.1	Hemisphere	162172	12000
	4183.DAT	Marker 3	109	0	109	3	PL2	185	0	13.5	337601	0.2	0.1	Hemisphere	162172	12000
	4183.DAT	Marker 4	60	0	60	3	IL2	185	0	13.5	185835	0.17	0.13	Hemisphere	162172	12000
	4183.DAT	All Markers	550	0	550	3		185	0	13.5	1.70349e+06	0.18	0.06	Hemisphere	162172	12000
M CON	4188.DAT	Marker 1	220	0	220	3	PL5	215	0	12.7	642178	0.19	0.08	Hemisphere	152838	12000
	4188.DAT	Marker 2	72	0	72	3	IL5	215	0	12.7	210167	0.16	0.12	Hemisphere	152838	12000
	4188.DAT	Marker 3	162	0	162	3	PL2	215	0	12.7	472877	0.2	0.09	Hemisphere	152838	12000
	4188.DAT	Marker 4	67	0	67	3	IL2	215	0	12.7	195572	0.16	0.12	Hemisphere	152838	12000
	4188.DAT	All Markers	521	0	521	3		215	0	12.7	1520795	0.17	0.06	Hemisphere	152838	12000
M CON	4189.DAT	Marker 1	98	0	98	3	PL5	218	0	13.2	295848	0.19	0.11	Hemisphere	158067	12000
	4189.DAT	Marker 2	38	0	38	3	IL5	218	0	13.2	114717	0.18	0.16	Hemisphere	158067	12000
	4189.DAT	Marker 3	30	0	30	3	PL2	218	0	13.2	90565.7	0.19	0.18	Hemisphere	158067	12000
	4189.DAT	Marker 4	4	0	4	3	IL2	218	0	13.2	12075.4	0.48	0.5	Hemisphere	158067	12000
	4189.DAT	All Markers	170	0	170	3		218	0	13.2	513206	0.15	0.08	Hemisphere	158067	12000
M ELS	4117.DAT	Marker 1	151	0	151	3	PL5	229	0	16.5	570428	0.13	0.08	Hemisphere	197798	12000
	4117.DAT	Marker 2	61	0	61	3	IL5	229	0	16.5	230438	0.19	0.13	Hemisphere	197798	12000
	4117.DAT	Marker 3	139	0	139	3	PL2	229	0	16.5	525096	0.16	0.09	Hemisphere	197798	12000
	4117.DAT	Marker 4	38	0	38	3	IL2	229	0	16.5	143551	0.2	0.16	Hemisphere	197798	12000
	4117.DAT	All Markers	389	0	389	3		229	0	16.5	1.46951e+06	0.14	0.06	Hemisphere	197798	12000
M ELS	4191.DAT	Marker 1	308	0	308	3	PL5	204	0	12.8	903929	0.16	0.07	Hemisphere	153668	12000
	4191.DAT	Marker 2	114	0	114	3	IL5	204	0	12.8	334571	0.2	0.1	Hemisphere	153668	12000
	4191.DAT	Marker 3	288	0	288	3	PL2	204	0	12.8	845232	0.16	0.07	Hemisphere	153668	12000
	4191.DAT	Marker 4	72	0	72	3	IL2	204	0	12.8	211308	0.23	0.13	Hemisphere	153668	12000
	4191.DAT	All Markers	782	0	782	3		204	0	12.8	2.29504e+06	0.16	0.05	Hemisphere	153668	12000
M ELS	4179.DAT	Marker 1	137	0	137	3	PL5	226	0	12.9	405904	0.22	0.1	Hemisphere	155132	12000
	4179.DAT	Marker 2	50	0	50	3	IL5	226	0	12.9	148140	0.25	0.15	Hemisphere	155132	12000
	4179.DAT	Marker 3	78	0	78	3	PL2	226	0	12.9	231098	0.22	0.12	Hemisphere	155132	12000
	4179.DAT	Marker 4	8	0	8	3	IL2	226	0	12.9	23702.4	0.42	0.36	Hemisphere	155132	12000
	4179.DAT	All Markers	273	0	273	3		226	0	12.9	808844	0.21	0.08	Hemisphere	155132	12000
M ELS	4180.DAT	Marker 1	180	0	180	3	PL5	248	0	12.4	512593	0.23	0.09	Hemisphere	149107	12000
	4180.DAT	Marker 2	34	0	34	3	IL5	248	0	12.4	96823.1	0.22	0.17	Hemisphere	149107	12000
	4180.DAT	Marker 3	132	0	132	3	PL2	248	0	12.4	375901	0.25	0.1	Hemisphere	149107	12000
	4180.DAT	Marker 4	3	0	3	3	IL2	248	0	12.4	8543.21	0.64	0.58	Hemisphere	149107	12000
	4180.DAT	All Markers	349	0	349	3		248	0	12.4	993861	0.23	0.07	Hemisphere	149107	12000
F CON	4131.DAT	Marker 1	78	0	78	3	PL5	199	0	15.7	281390	0.18	0.12	Hemisphere	188892	12000
	4131.DAT	Marker 2	34	0	34	3	IL5	199	0	15.7	122657	0.23	0.17	Hemisphere	188892	12000
	4131.DAT	Marker 3	42	0	42	3	PL2	199	0	15.7	151518	0.21	0.16	Hemisphere	188892	12000
	4131.DAT	Marker 4	13	0	13	3	IL2	199	0	15.7	46898.3	0.4	0.28	Hemisphere	188892	12000
	4131.DAT	All Markers	167	0	167	3		199	0	15.7	602463	0.14	0.08	Hemisphere	188892	12000
F CON	4164.DAT	Marker 1	60	0	60	3	PL5	200	0	20.5	281517	0.18	0.13	Hemisphere	245670	12000
	4164.DAT	Marker 2	75	0	75	3	IL5	200	0	20.5	351896	0.27	0.13	Hemisphere	245670	12000
	4164.DAT	Marker 3	43	5	40.5	3	PL2	200	0	20.5	190024	0.25	0.16	Hemisphere	245670	12000
	4164.DAT	Marker 4	16	0	16	3	IL2	200	0	20.5	75071.2	0.25	0.25	Hemisphere	245670	12000
	4164.DAT	All Markers	194	5	191.5	3		200	0	20.5	898509	0.13	0.08	Hemisphere	245670	12000
F CON	4173.DAT	Marker 1	131	0	131	3	PL5	205	0	17.8	535112	0.19	0.09	Hemisphere	213881	12000
	4173.DAT	Marker 2	74	0	74	3	IL5	205	0	17.8	302277	0.26	0.13	Hemisphere	213881	12000
	4173.DAT	Marker 3	125	0	125	3	PL2	205	0	17.8	510603	0.17	0.09	Hemisphere	213881	12000
	4173.DAT	Marker 4	34	0	34	3	IL2	205	0	17.8	138884	0.28	0.18	Hemisphere	213881	12000
	4173.DAT	All Markers	364	0	364	3		205	0	17.8	1.48688e+06	0.18	0.06	Hemisphere	213881	12000
F ELS	4159.DAT	Marker 1	230	0	230	3	PL5	179	0	19.4	1.0203e+06	0.21	0.08	Hemisphere	232274	12000
	4159.DAT	Marker 2	83	3	81.5	3	IL5	179	0	19.4	361542	0.16	0.11	Hemisphere	232274	12000
	4159.DAT	Marker 3	204	1	203.5	3	PL2	179	0	19.4	902746	0.18	0.08	Hemisphere	232274	12000
	4159.DAT	Marker 4	27	0	27	3	IL2	179	0	19.4	119775	0.27	0.2	Hemisphere	232274	12000
	4159.DAT	All Markers	544	4	542	3		179	0	19.4	2.40437e+06	0.18	0.06	Hemisphere	232274	12000
F ELS	4174.DAT	Marker 1	252	0	252	3	PL5	200	0	16.7	965692	0.16	0.07	Hemisphere	200649	12000
	4174.DAT	Marker 2	77	0	77	3	IL5	200	0	16.7	295073	0.15	0.12	Hemisphere	200649	12000
	4174.DAT	Marker 3	196	0	196	3	PL2	200	0	16.7	751094	0.21	0.08	Hemisphere	200649	12000
	4174.DAT	Marker 4	50	0	50	3	IL2	200	0	16.7	191606	0.38	0.16	Hemisphere	200649	12000
	4174.DAT	All Markers	575	0	575	3		200	0	16.7	2203465	0.17	0.06	Hemisphere	200649	12000
F ELS	4175.DAT	Marker 1	379	0	379	3	PL5	251	0	16	1.39307e+06	0.2	0.07	Hemisphere	192457	12000
	4175.DAT	Marker 2	135	0	135	3	IL5	251	0	16	496213	0.2	0.1	Hemisphere	192457	12000
	4175.DAT	Marker 3	356	0	356	3	PL2	251	0	16	1.30853e+06	0.15	0.06	Hemisphere	192457	12000
	4175.DAT	Marker 4	92	0	92	3	IL2	251	0	16	338160	0.17	0.11	Hemisphere	192457	12000
	4175.DAT	All Markers	962	0	962	3		251	0	16	3535976	0.17	0.05	Hemisphere	192457	12000
F ELS	4176.DAT	Marker 1	441	0	441	3	PL5	217	0	16.7	1.68789e+06	0.12	0.05	Hemisphere	200403	12000
	4176.DAT	Marker 2	98	0	98	3	IL5	217	0	16.7	375086	0.16	0.1	Hemisphere	200403	12000
	4176.DAT	Marker 3	172	0	172	3	PL2	217	0	16.7	658315	0.18	0.08	Hemisphere	200403	12000
	4176.DAT	Marker 4	28	0	28	3	IL2	217	0	16.7	107168	0.23	0.19	Hemisphere	200403	12000
	4176.DAT	All Markers	739	0	739	3		217	0	16.7	2.82846e+06	0.12	0.04	Hemisphere	200403	12000
F ELS	4177.DAT	Marker 1	97	0	97	3	PL5	209	0	19	421443	0.2	0.11	Hemisphere	227492	12000
	4177.DAT	Marker 2	13	0	13	3	IL5	209	0	19	56482.1	0.36	0.28	Hemisphere	227492	12000
	4177.DAT	Marker 3	43	0	43	3	PL2	209	0	19	186825	0.26	0.16	Hemisphere	227492	12000
	4177.DAT	Marker 4	13	0	13	3	IL2	209	0	19	56482.1	0.46	0.29	Hemisphere	227492	12000
	4177.DAT	All Markers	166	0	166	3		209	0	19	721233	0.18	0.09	Hemisphere	227492	12000
F ELS	4185.DAT	Marker 1	220	0	220	3	PL5	214	0	12.6	637510	0.22	0.08	Hemisphere	151727	12000
	4185.DAT	Marker 2	59	0	59	3	IL5	214	0	12.6	170969	0.24	0.14	Hemisphere	151727	12000
	4185.DAT	Marker 3	66	0	66	3	PL2	214	0	12.6	191253	0.33	0.14	Hemisphere	151727	12000
	4185.DAT	Marker 4	15	0	15	3	IL2	214	0	12.6	43466.6	0.25	0.26	Hemisphere	151727	12000
	4185.DAT	All Markers	360	0	360	3		214	0	12.6	1.0432e+06	0.23	0.07	Hemisphere	151727	12000
