# Supplementary material for: Altered corticolimbic connectivity reveals sex-specific adolescent outcomes in a rat model of early life adversity
Source: eLife. 2020 Jan 20;9:e52651. doi: 10.7554/eLife.52651 (PMC7010412; doi:10.7554/eLife.52651)
Supplement: Figure 3—source data 1. [file elife-52651-fig3-data1.xlsx]

## Sheet: Sheet1
BDA Tracer Study - Elevated Plus Maze			** indicates EPM done without red light
ID number	Group	Sex	Age	Date	HB	Toe	Tail	Sec Closed	Sec Open	# crossing arms	# head dippings	# falls
21.07**	CON	F	PD28	2016-07-27	HB 168	Toe 6	Tail 1	211	89	26	21	1
21.08**	CON	F	PD28	2016-07-27	HB 172	Toe 6	Tail 2	218	82	20	15
21.15**	CON	F	PD28	2016-09-14	HB 174	Toe 7	Tail 1	236	64	14	8
21.16**	CON	F	PD28	2016-09-14	HB 176	Toe 7	Tail 2	209	91	12	12
21.23	CON	F	PD28	2017-02-08	HB 186	Toe 7	Tail 1	239	61	20	14
21.24	CON	F	PD28	2017-02-08	HB 188	Toe 8	Tail 2	206	94	15	16
21.33	CON	F	PD28	2017-05-26	HB 200	Toe 7	Tail 1	259	41	9	6	1
21.34	CON	F	PD28	2017-05-26	HB 202	Toe 8	Tail 2	280	20	11	7
21.4	CON	F	PD28	2017-09-29	HBC1	Toe7	Tail 1	227	73	18	2
21.41	CON	F	PD28	2017-09-29	HBC1	Toe 8	Tail 2	202	98	16	5
21.43	CON	F	PD28	2017-09-29	HBC2	Toe 7	Tail 1	250	50	12	3
21.55	CON	F	PD28	2017-09-18	HB 220	Toe 3	Tail 1	209	91	17	2
21.56	CON	F	PD28	2017-09-18	HB 224	Toe 7	Tail 2	275	25	14	2
21.62	CON	F	PD28	2017-10-04	HB 228	Toe 4	Tail 1	230	70	20	5
21.63	CON	F	PD28	2017-10-04	HB 228	Toe 5	Tail 2	231	69	22	6
21.77	CON	F	PD28	2018-01-24	HB 236	Toe 5	Tali 1	255	45	16	5
21.78	CON	F	PD28	2018-01-24	HB 238	Toe 4	Tail 2	217	83	20	8
21.89	CON	F	PD28	2018-03-15	Gen1 L12	Toe 10	Tail 1	207	93	15	14
21.9	CON	F	PD28		Gen1 E1	Toe 9	Tail 2	216	84	21	15	1
									19
21.05**	ELS	F	PD28	2016-07-27	HB 169	Toe 6	Tail 1	225	75	24	12
21.06**	ELS	F	PD28	2016-07-27	HB 171	Toe 6	Tail 2	249	51	20	14
21.13**	ELS	F	PD28	2016-09-14	HB 175	Toe 7	Tail 1	237	63	16	9
21.14**	ELS	F	PD28	2016-09-14	HB 177	Toe 7	Tail 2	257	43	15	6
21.21	ELS	F	PD28	2017-02-08	HB 189	Toe 7	Tail 1	259	41	16	9
21.22	ELS	F	PD28	2017-02-08	HB 191	Toe 8	Tail 2	211	89	22	12
21.31	ELS	F	PD28	2017-05-26	HB 201	Toe 7	Tail 1	285	15	12	4
21.32	ELS	F	PD28	2017-05-26	HB 203	Toe 8	Tail 2	264	36	16	10
21.35	ELS	F	PD28	2017-05-26	HB 207	Toe 6	Tail 3	259	41	15	11
21.46	ELS	F	PD28	2017-08-18	HB 219	Toe11	Tail 1	220	80	22	2
21.53	ELS	F	PD28	2017-09-18	HB 221	Toe 6	Tail 1	267	33	11	2
21.54	ELS	F	PD28	2017-09-18	HB 223	Toe 7	Tail 2	267	33	12	4
21.58	ELS	F	PD28	2017-10-04	HB 229	Toe 6	Tail 1	245	55	16	6
21.59	ELS	F	PD28	2017-10-04	HB 231	Toe 7	Tail 2	286	14	15	6
21.6	ELS	F	PD28	2017-10-04	HB 229	Toe 7	Tail 1	217	83	18	8
21.61	ELS	F	PD28	2017-10-04	HB 231	Toe 6	Tail 2	234	66	6	7
21.75	ELS	F	PD28	2018-01-24	HB 237	Toe 8	Tail 1	282	18	14	2
21.76	ELS	F	PD28	2018-01-24	HB 239	Toe 9	Tail 2	279	21	10	3
21.85	ELS	F	PD28	2018-03-14	Gen1L6	Toe 10	Tail 1	239	61	12	15
21.86	ELS	F	PD28	2018-03-14	Gen1E2	Toe 3	Tail 2	271	29	21	16
									20
31.07**	CON	F	PD38	2016-08-05	HB 168	Toe 7	Tail 1	253	47	15	5
31.08**	CON	F	PD38	2016-08-05	HB 172	Toe 7	Tail 2	229	71	26	12
31.16**	Con	F	PD38	2016-09-25	HB 176	Toe 8	Tails 2	246	54	21	6
31.23**	CON	F	PD38	2016-12-09	HB 180	Toe 9	Tail 1	280	20	10	4
31.24**	CON	F	PD38	2016-12-09	HB 182	Toe 8	Tail 2	261	39	14	6
31.15**	CON	F	PD38	2016-09-25	HB 174	Toe 8	Tail 1	262	38	19	6
31.31	CON	F	PD38	2017-02-17	HB188	Toe 7	Tail 1	271	29	9	10
31.32	CON	F	PD38	2017-02-17	HB190	Toe 8	Tail 2	268	32	13	8
31.37	CON	F	PD38	2017-06-08	HB 200	Toe 8	Tail 1	254	46	12	7
31.38	CON	F	PD38	2017-06-08	HB 202	Toe 7	Tail 2	228	72	18	5
31.49	CON	F	PD38	2017-07-14	HB 208	Toe 7	Tail 1	281	19	6	1
31.5	CON	F	PD38	2017-07-14	HB 112	Toe 8	Tail 2	257	43	17	7
31.51	CON	F	PD38	2017-08-18	JH2	Toe 10	Tail 1	217	83	15	16
31.52	CON	F	PD38	2017-08-18	JH2	Toe 4	Tail 2	164	136	20	26
31.53	CON	F	PD38	2017-08-31	HB 214	Toe 10	Tail 1	221	79	13	12
31.54	CON	F	PD38	2017-08-31	HB 216	Toe 9	Tail 2	229	71	20	13
31.56	CON	F	PD38	2017-08-31	HB 218	Toe 10	Tail 1	203	97	15	18
31.57	CON	F	PD38	2017-08-31	HB 218	Toe 11	Tail 2	205	95	15	17
31.62	CON	F	PD38	2017-09-27	HB 220	Toe 7	Tail 1	230	70	20	6
31.63	CON	F	PD38	2017-09-27	HB 224	Toe 5	Tail 2	234	66	14	4
									20
31.05**	ELS	F	PD38	2016-08-05	HB 169	Toe 7	Tail 1	224	76	23	13
31.06**	ELS	F	PD38	2016-08-05	HB 171	Toe 7	Tail 2	281	19	13	5
31.13**	ELS	F	PD38	2016-09-25	HB 175	Toe 8	Tail 1	247	53	15	5
31.14**	ELS	F	PD38	2016-09-25	HB 177	Toe 8	Tail 2	280	20	11	3
31.21**	ELS	F	PD38	2016-12-09	HB 181	Toe 8	Tail 1	276	24	9	3
31.22**	ELS	F	PD38	2016-12-09	HB 183	Toe 9	Tail 2	263	37	17	5
31.29	ELS	F	PD38	2017-02-17	HB187	Toe 8	Tail 1	209	91	19	27	1
31.3	ELS	F	PD38	2017-02-17	HB191	Toe 7	Tail 2	237	63	20	24
31.35	ELS	F	PD38	2017-06-08	HB 201	Toe 8	Tail 1	260	40	13	9
31.36	ELS	F	PD38	2017-06-08	HB 203	Toe 9	Tail 2	280	20	14	5
31.39	ELS	F	PD38	2017-06-08	HB 205	Toe 9	Tail 1	264	36	17	12
31.4	ELS	F	PD38	2017-06-08	HB 207	Toe 9	Tail 2	273	27	18	12
31.44	ELS	F	PD38	2017-07-14	HB 209	Toe 6	Tail 1	282	18	12	1
31.46	ELS	F	PD38	2017-07-14	HB 209	Toe 7	Tail 1	283	17	8	2
31.47	ELS	F	PD38	2017-07-14	HB 211	Toe 8	Tail 2	262	38	18	7
31.48	ELS	F	PD38	2017-07-14	HB 209	Toe 8	tail 1	284	16	8	3
31.64	ELS	F	PD38	2017-09-27	HB 221	Toe 7	Tail 1	248	52	17	4
31.65	ELS	F	PD38	2017-09-27	HB 223	Toe 6	Tail 2	266	34	19	2
31.66	ELS	F	PD38	2018-02-02	HB 237	Toe 7	Tail 1	279	21	6	3
31.67	ELS	F	PD38	2018-02-02	HB239	Toe 6	Tail 2	218	82	18	8
31.68	ELS	F	PD38	2018-02-02	HB 239	Toe 8	Tail 1	283	17	13	2	1
31.69	ELS	F	PD38	2018-02-02	HB 241	Toe 7	Tail 2	261	39	11	3
31.74	ELS	F	PD38	2018-03-23	Gen1L2	Toe 10	Tail 1	285	15	19	2
31.75	ELS	F	PD38		Gen1L4	Toe 9	Tail2	281	19	18	3
									24
41.07**	CON	F	PD48	2016-08-15	HB 168	Toe 8	Tail 1	262	38	23	5
41.08**	CON	F	PD48	2016-08-15	HB 172	Toe 8	Tail 2	222	78	28	11
41.16**	CON	F	PD48	2016-10-03	HB 176	Toe 9	Tail 2	259	41	19	4
41.15**	CON	F	PD48	2016-10-03	HB 174	Toe 9	Tail 1	234	66	19	9
41.23**	CON	F	PD48	2016-12-19	HB 180	Toe 8	Tail 1	270	30	12	3
41.24**	CON	F	PD48	2016-12-19	HB 182	Toe 9	Tail 2	286	14	12	2
41.31	CON	F	PD48	2017-02-28	HB 186	Toe 8	Tail 1	250	50	19	8
41.37	CON	F	PD48	2017-06-16	HB 200	Toe 9	Tail 1	267	33	13	6
41.38	CON	F	PD48	2017-06-16	HB 202	Toe 10	Tail 2	244	56	13	9
41.43	CON	F	PD48	2017-06-16	HB 204	Toe 7	Tail 1	274	26	9	10
41.44	CON	F	PD48	2017-06-16	HB 206	Toe 4	Tail 2	267	33	12	15
41.51	CON	F	PD48	2017-07-25	HB 208	Toe 6	Tail 1	251	49	7	4
41.52	CON	F	PD48	2017-07-25	HB 212	Toe 6	Tail 2	291	9	5	3	1
41.53	CON	F	PD48	2017-07-25	HB 208	Toe 8	Tail 1	191	109	18	7
41.54	CON	F	PD48	2017-07-25	HB 212	Toe 7	Tail 2	193	107	19	14	1
41.55	CON	F	PD48	2017-08-29	HBC 1	Toe 11	Tail 1	249	51	15	15
41.56	CON	F	PD48	2017-08-29	HBC 2	Toe 6	Tail 2	218	82	23	18
41.47	CON	F	PD48	2017-08-29	HBC 1	Toe 9	Tail 1	213	87	21	16
41.58	CON	F	PD48	2017-08-29	HBC 2	Toe 9	Tail 2	209	91	24	23
41.69	CON	F	PD48	2017-10-06	HB 220	Toe 8	Tail 1	219	81	17	7
41.7	CON	F	PD48	2017-10-06	HB 224	Toe 4	Tail 2	214	86	21	9
41.72	CON	F	PD48	2017-10-24	HB 228	Toe 6	Tail 1	174	126	23	14	1
41.73	CON	F	PD48	2017-10-24	HB 228	Toe 7	Tail 2	215	85	17	10
41.86	CON	F	PD48	2018-02-13	HB 236	Toe 7	Tail 1	233	67	16	7
41.87	CON	F	PD48	2018-02-13	HB 238	Toe 5	Tail 2	265	35	11	2
41.92	CON	F	PD48	2018-04-03	Gen1L8	Toe 9	Tail 1	288	12	7	1	1
41.93	CON	F	PD48	2018-04-03	Gen1L10	Toe 10	Tail 2	270	30	11	3
41.05**	ELS	F	PD48	2016-08-15	HB 169	Toe 8	Tail 1	244	56	22	11
41.06**	ELS	F	PD48	2016-08-15	HB 171	Toe 8	Tail 2	271	29	17	4
41.13**	ELS	F	PD48	2016-10-03	HB 175	Toe 9	Tail 1	239	61	20	9
41.14**	ELS	F	PD48	2016-10-03	HB 177	Toe 9	Tail 2	241	58	17	6
41.21**	ELS	F	PD48	2016-12-19	HB 181	Toe 7	Tail 1	268	32	10
41.22**	ELS	F	PD48	2016-12-19	HB 183	Toe 6	Tail 2	279	21	13	2
41.29	ELS	F	PD48	2017-02-28	HB 187	Toe 9	Tail 1	252	48	17	7
41.30.	ELS	F	PD48	2017-02-28	HB 189	Toe 8	Tails 2	265	35	17	12
41.36	ELS	F	PD48	2017-06-16	HB 203	Toe 10	Tail 2	285	15	9	4
41.39	ELS	F	PD48	2017-06-16	HB 205	Toe 7	Tail 1	216	84	20	19
41.4	ELS	F	PD48	2017-06-16	HB 207	Toe 7	Tail 2	223	77	19	10
41.41	ELS	F	PD48	2017-06-16	HB 205	Toe 10	Tail 1	298	2	4	0
41.43	ELS	F	PD48	2017-06-16	HB 207	Toe 10	Tail 2	276	24	13	7
41.48	ELS	F	PD48	2017-07-25	HB 211	Toe 10	Tail 1	164	136	20	15
41.49	ELS	F	PD48	2017-07-25	HB 213	Toe 11	Tail 2	213	87	22	7
41.5	ELS	F	PD48	2017-07-25	HB 213	Toe 7	Tail 1	192	108	20	11
41.59	ELS	F	PD48	2017-08-29	JH 1	Toe 10	Tail 1	274	26	12	15
41.6	ELS	F	PD48	2017-08-29	JH 23	Toe 9	Tail 2	259	41	16	15
41.61	ELS	F	PD48	2017-09-08	HB 217	Toe 11	Tail 1	240	60	16	11
41.62	ELS	F	PD48	2017-09-08	HB 219	Toe 7	Tail 2	255	45	17	10
41.65	ELS	F	PD48	2017-10-06	HB 221	Toe 8	Tail 1	251	49	16	4	1
41.66	ELS	F	PD48	2017-10-06	HB 223	Toe 5	Tail 2	261	39	14	3
41.74	ELS	F	PD48	2017-10-24	HB 229	Toe 8	Tail 1	290	10	16	2
41.75	ELS	F	PD48	2017-10-24	HB 231	Toe 9	Tail 2	272	28	14	3
41.76	ELS	F	PD48	2017-10-24	HB 229	Toe 9	Tail 1	284	16	19	2
41.77	ELS	F	PD48	2017-10-24	HB 231	Toe 8	Tail 2	238	62	16	6
41.64	ELS	F	PD48	2018-02-13	HB 239	Toe 7	Tail 1	237	63	19	8
41.85	ELS	F	PD48	2018-02-13	HB 241	Toe 8	Tail 2	272	28	20	1
21.03**	CON	M	PD28	2016-07-27	HB 168	Toe 1	Tail 1	229	71	23	16
21.04**	CON	M	PD28	2016-07-27	HB 170	Toe 1	Tail 2	244	56	30	15
21.11**	CON	M	PD28	2016-09-14	HB 174	Toe 4	Tail 1	257	43	17	3
21.12**	CON	M	PD28	2016-09-14	HB 176	Toe 4	Tail 2	266	34	17	5
21.19	CON	M	PD28	2017-02-08	HB 186	Toe 1	Tail 1	279	21	12	6
21.2	CON	M	PD28	2017-02-08	HB 188	Toe 2	Tail 2	265	35	15	10
21.28	CON	M	PD28	2017-05-26	HB 200	Toe 1	Tail 1	278	22	11	4
21.29	CON	M	PD28	2017-05-26	HB 202	Toe 2	Tail 2	258	42	18	13
21.3	CON	M	PD28	2017-05-26	HB 200	Toe 5	Tail 3	239	61	19	14
21.36	CON	M	PD28	2017-09-29	HBC1	Toe 4	Tail 1	270	30	5	3
21.37	CON	M	PD28	2017-09-29	HBC2	Toe 5	Tail 2	236	64	25	6
21.38	CON	M	PD28	2017-09-29	HBC1	Toe 5	Tail 1	200	100	24	2	1
21.39	CON	M	PD28	2017-09-29	HBC2	Toe 4	Tail 2	270	30	13	4	1
21.44	CON	M	PD28	2019-08-18	HB 216	Toe 7	Tail 1	230	70	17	15
21.45	CON	M	PD28	2019-08-18	HB 218	Toe 1	Tail 2	192	108	17	15
21.47	CON	M	PD28	2017-09-18	HB 229	Toe 1	Tail 1	239	61	14	5
21.48	CON	M	PD28	2017-09-18	HB 222	Toe 2	Tail 2	251	49	15	5
21.49	CON	M	PD28	2017-09-18	HB 226	Toe 3	Tail 3	243	57	17	4
21.57	CON	M	PD28	2017-10-04	HB 230	Toe 9	Tail 1	209	91	17	11
21.68	CON	M	PD28	2018-01-24	HB 240	Toe 3	Tail 1	246	54	20	7
21.79	CON	M	PD28	2018-02-14	HB 244	Toe 6	Tail 1	251	49	18	13
21.8	CON	M	PD28	2018-02-14	HB 248	Toe 4	Tail 2	276	24	11	10
21.87	CON	M	PD28	2018-03-15	Gen1 L12	Toe 1	Tail 1	189	111	18	25
21.88	CON	M	PD28	2018-03-15	Gen1 E1	Toe 6	Tail 2	273	27	13	11
21.01**	ELS	M	PD28	2016-07-27	HB 169	Toe 1	Tail 1	212	88	27	8
21.02**	ELS	M	PD28	2016-07-27	HB 171	Toe 1	Tail 2	248	52	22	8
21.09**	ELS	M	PD28	2016-09-14	HB 175	Toe 4	Tail 1	260	40	11	6
21.10.**	ELS	M	PD28	2016-09-14	HB 177	Toe 4	Tail 2	239	61	20	4
21.17	ELS	M	PD28	2017-02-08	HB 187	Toe 1	Tail 1	263	37	14	2
21.18	ELS	M	PD28	2017-02-08	HB 189	Toe 1	Tail 2	257	43	14	3
21.25	ELS	M	PD28	2017-05-26	HB 201	Toe 1	Tail 1	219	81	18	12
21.26	ELS	M	PD28	2017-05-26	HB 203	Toe 2	Tail 2	288	12	12	6
21.27	ELS	M	PD28	2017-05-26	HB 207	Toe 5	Tail 3	250	50	20	18
21.42	ELS	M	PD28	2017-08-09	JH3	Toe 3	Tail 1	253	47	15	3
21.51	ELS	M	PD28	2017-09-18	HB 223	Toe 2	Tail 2	290	10	9	2
21.52	ELS	M	PD28	2017-09-18	HB 225	Toe 3	Tail 3	230	70	17	8
21.69	ELS	M	PD28	2018-01-24	HB 237	Toe 4	Tail 1	260	40	7	7
21.7	ELS	M	PD28	2018-01-24	HB 239	Toe 5	Tail 2	270	30	14	3
21.71	ELS	M	PD28	2018-01-24	HB 239	Toe 4	Tail 1	283	17	11	3
21.72	ELS	M	PD28	2018-01-24	HB 241	Toe 5	Tail 2	248	52	15	4
21.73	ELS	M	PD28	2018-01-24	HB 237	Toe 5	Tail 1	284	16	9	2
21.74	ELS	M	PD28	2018-01-24	HB 241	Toe 3	Tail 2	276	24	13	4
21.81	ELS	M	PD28	2018-02-14	HB 247	Toe 2	Tail 1	233	67	18	15
21.82	ELS	M	PD28	2018-02-14	HB 249	Toe 3	Tail 2	268	32	19	10
21.83	ELS	M	PD28	2018-03-14	Gen1L6	Toe 5	Tail 1	284	16	11	7
21.84	ELS	M	PD28	2018-03-14	Gen1 E2	Toe 1	Tail 2	222	78	20	17
31.03**	CON	M	PD38	2016-08-05	HB 168	Toe 2	Tail 1	250	50	21	11
31.11**	CON	M	PD38	2016-09-25	HB 174	Toe 3	Tail 1	249	51	13	10
31.12**	CON	M	PD38	2016-09-25	HB 176	Toe 3	Tail 2	269	31	13	6	1
31.2**	CON	M	PD38	2016-12-09	HB 182	Toe 4	Tail 2	275	25	11	6
31.04**	CON	M	PD38	2016-08-05	HB 170	Toe 2	Tail 2	243	57	19	8
31.19**	CON	M	PD38	2016-12-09	HB 180	Toe 3	Tail 1	285	15	9	2
31.27	CON	M	PD38	2017-02-17	HB 188	Toe 1	Tail 1	233	67	31	20
31.28	CON	M	PD38	2017-02-17	HB 190	Toe 2	Tail 2	239	61	14	12
31.41	CON	M	PD38	2017-07-14	HB 208	Toe 3	Tail 1	233	67	8	6
31.42	CON	M	PD38	2017-07-14	HB 210	Toe 3	Tail 2	293	7	4	3
31.43	CON	M	PD38	2017-07-14	HB 212	Toe 2	Tail 3	274	26	15	6
31.55	CON	M	PD38	2017-08-31	HB 214	Toe 3	Tail 3	187	113	20	16
31.6	CON	M	PD38	2017-09-27	HB 220	Toe 2	Tail 1	224	76	18	11
31.61	CON	M	PD38	2017-09-27	HB 222	Toe 1	Tail 2	259	41	19	6
31.7	CON	M	PD38	2018-03-23	Gen1L7	Toe 8	Tail 1	268	32	11	4	1
31.71	CON	M	PD38	2018-03-23	Gen1L9	Toe 1	Tail 2	260	40	9	3	2
31.01**	ELS	M	PD38	2016-08-05	HB 169	Toe 2	Tail 1	265	35	15	6
31.02**	ELS	M	PD38	2016-08-05	HB 171	Toe 2	Tail 2	254	46	21	6	1
31.09**	ELS	M	PD38	2016-09-25	HB 175	Toe 3	Tail 1	276	24	13	3
31.10.**	ELS	M	PD38	2016-09-25	HB 177	Toe 3	Tail 2	247	53	20	8
31.17	ELS	M	PD38	2016-12-09	HB 181	Toe 3	Tail 1	277	23	11	2
31.18	ELS	M	PD38	2016-12-09	HB 183	Toe 4	Tail 2	228	72	20	6
31.25	ELS	M	PD38	2017-02-17	HB189	Toe 1	Tail 1	178	122	21	25
31.26	ELS	M	PD38	2017-02-17	HB191	Toe 2	Tail 2	219	81	30	20
31.33	ELS	M	PD38	2017-06-08	HB 201	Toe 2	Tail 1	280	20	7	6
31.34	ELS	M	PD38	2017-06-08	HB 203	Toe 1	Tail 2	285	15	13	11
31.58	ELS	M	PD38	2017-09-27	HB 221	Toe 2	Tail 1	288	12	16	2
31.59	ELS	M	PD38	2017-09-27	HB 223	Toe 1	Tail 2	282	18	13	1
31.72	ELS	M	PD38	2018-03-23	Gen1L5	Toe 1	Tail 1	270	30	16	4
31.73	ELS	M	PD38	2018-03-23	Gen1L6	Toe 7	Tail 2	296	4	6	0
41.04**	CON	M	PD48	2016-08-15	HB 170	Toe 3	Tail 2	295	5	9	0
41.11**	CON	M	PD48	2016-10-03	HB 174	Toe 2	Tail 1	299	1	3	1
41.12**	CON	M	PD48	2016-10-03	HB 176	Toe 2	Tail 2	271	29	6	3
41.03**	CON	M	PD48	2016-08-15	HB 168	Toe 3	Tail 1	266	34	16	5
41.19**	CON	M	PD48	2016-12-19	HB 180	Toe 2	Tail 1	293	7	11	4
41.20.**	CON	M	PD48	2016-12-19	HB 182	Toe 1	Tail 2	262	38	22	6
41.27	CON	M	PD48	2017-02-28	HB 186	Toe 3	Tail 1	243	57	12	6
41.28	CON	M	PD48	2027-02-18	HB 190	Toe 1	Tail 2	221	79	15	16
41.33	CON	M	PD48	2017-06-16	HB 200	Toe 3	Tail 1	236	64	15	2
41.34	CON	M	PD48	2017-06-16	HB 202	Toe 4	Tail 2	300	0	0	4
41.64	CON	M	PD48	2017-09-08	HB 218	Toe 1	Tail 2	262	38	11	5
41.71	CON	M	PD48	2017-10-06	HB 226	Toe 1	Tail 1	272	28	13	0	1
41.81	CON	M	PD48	2018-02-13	HB 236	Toe 4	Tail 1	295	5	4	8	very anxious before testing
41.72	CON	M	PD48	2018-02-13	HB 240	Toe 4	Tail 2	224	76	17	3
41.83	CON	M	PD48	2018-02-13	HB 250	Toe 5	Tail 3	266	34	10	8
41.88	CON	M	PD48	2018-04-03	Gen1L9	Toe8	Tail 1	281	19	11	2	1
41.89	CON	M	PD48	2018-04-03	Gen1L1	Toe1	Tail 2	275	25	16	3
41.01**	ELS	M	PD48	2016-08-15	HB 169	Toe 3	Tail 1	270	30	18	2
41.02**	ELS	M	PD48	2016-08-15	HB 173	Toe 3	Tail 2	278	22	16	4
41.09**	ELS	M	PD48	2016-10-03	HB 175	Toe 2	Tail 1	249	51	9	5
41.10.**	ELS	M	PD48	2016-10-03	HB 177	Toe 2	Tail 2	256	44	12	4
41.17**	ELS	M	PD48	2016-12-19	HB 181	Toe 2	Tail 1	293	7	3	1
41.18**	ELS	M	PD48	2016-12-19	HB 183	Toe 1	Tail 2	287	13	7	2
41.25	ELS	M	PD48	2017-02-28	HB 187	Toe 3	Tail 1	270	30	12	12
41.26	ELS	M	PD48	2017-02-28	HB 191	Toe 1	Tail 2	226	74	17	16
41.32	ELS	M	PD48	2017-06-16	HB 201	Toe 3	Tail 1	255	45	12	7
41.45	ELS	M	PD48	2017-07-25	HB 209	Toe 2	Tail 1	143	157	13	10
41.46	ELS	M	PD48	2017-07-25	HB 211	Toe 1	Tail 2	280	20	5	7
41.47	ELS	M	PD48	2017-07-25	HB 213	Toe 1	Tail 3	215	85	7	7	1
41.67	ELS	M	PD48	2017-10-06	HB 225	Toe 2	Tail 1	185	115	19	10
41.68	ELS	M	PD48	2017-10-06	HB 227	Toe e1	Tail 2	280	20	6	2
41.78	ELS	M	PD48	2018-02-13	HB 237	Toe 6	Tail 1	294	6	8	2
41.79	ELS	M	PD48	2018-02-13	HB 241	Toe 4	Tail 2	273	27	13	5
41.8	ELS	M	PD48	2018-02-13	HB 241	Toe 6	Tail 3	264	36	14	4
41.9	ELS	M	PD48	2018-04-03	Gen1L1	Toe8	Tail1	294	6	13	1
41.91	ELS	M	PD48	2018-04-03	Gen1L3	Toe 1	Tail2	277	23	15	4
