# Supplementary material for: Altered corticolimbic connectivity reveals sex-specific adolescent outcomes in a rat model of early life adversity
Source: eLife. 2020 Jan 20;9:e52651. doi: 10.7554/eLife.52651 (PMC7010412; doi:10.7554/eLife.52651)
Supplement: Figure 6—figure supplement 1—source data 1. [file elife-52651-fig6-figsupp1-data1.xlsx]

## Sheet: FC EPM
ID number	Group	Sex	Age	Date of behavior	Litter	Toe	Tail	Video file #	Latency to first open	# crossing arms	# head dippings	Sec Open total
3	CON	M	PD28	2017-07-05	208	1	1	1333	6	9	15	27
4	CON	M	PD28	2017-07-05	210	2	2	1334	1	11	10	16
13	CON	M	PD28	2017-07-07	208	2	1	1356	1	26	17	85
14	CON	M	PD28	2017-07-07	212	1	2	1357	15	21	18	79
19	CON	M	PD28	2017-08-08	JH2	1	1	1758	78	13	11	37
20	CON	M	PD28	2017-08-08	JH4	2	2	1759	5	20	21	80
27	CON	M	PD28	2017-08-08	JH2	2	1	5	8			8
28	CON	M	PD28	2017-08-08	JH4	1	2	6	15			48
1	ELS	M	PD28	2017-07-05	209	1	1	1331	11	15	17	77
2	ELS	M	PD28	2017-07-05	211	2	2	1332	16	17	13	50
15	ELS	M	PD28	2017-07-10	209	3	1	1360	5	23	19	109
16	ELS	M	PD28	2017-07-10	211	1	2	1361	23	27	20	74
17	ELS	M	PD28	2017-08-08	JH 1	1	1	1757	9	21	14	66
18	ELS	M	PD28	2017-08-08	JH3	2	2	2	25			15
25	ELS	M	PD28	2017-08-08	JH1	2	1	3	11			4
26	ELS	M	PD28	2017-08-08	JH3	1	2	4	22			5
7	Con	F	PD28	2017-07-05	208	10	1	1336	29	13	8	35
8	Con	F	PD28	2017-07-10	210	11	2	1337	2	18	14	93
9	Con	F	PD28	2017-07-07	208	11	1	1352	10	15	9	33
10	Con	F	PD28	2017-07-07	212	11	2	1353	9	27	23	120
23	Con	F	PD28	2017-08-08	JH2	6	1	1762	19	14	15	87
24	Con	F	PD28	2017-08-08	JH4	7	2	1763	6	20	15	78
31	Con	F	PD28	2017-08-08	JH2	7	1	7	8			15
32	Con	F	PD28	2017-08-08	JH4	9	2	8	104			46
5	ELS	F	PD28	2017-07-05	209	10	1	1335	2	21	15	100
6	ELS	F	PD28	2017-07-05	209	10	2	1359	21	27	25	71
11	ELS	F	PD28	2017-07-07	211	9	1	1354	6	16	14	46
12	ELS	F	PD28	2017-07-07	213	9	2	1355	4	27	23	144
21	ELS	F	PD28	2017-08-08	JH1	6	1	1760	5	29	26	124
22	ELS	F	PD28	2017-08-08	JH3	7	2	1761	1	30	19	115
29	ELS	F	PD28	2017-08-08	JH1	7	1	9	45			17
30	ELS	F	PD28	2017-08-08	JH3	6	2	10	20			25
3	CON	M	PD48	2017-07-19	208	1	1	1532	270	7	9	7
4	CON	M	PD48	2017-07-19	210	2	2	1533	131	12	8	16
13	CON	M	PD48	2017-07-21	208	2	1	1542	300	8	10	0
14	CON	M	PD48	2017-07-21	212	1	2	1543	289	5	9	8
19	CON	M	PD48	2017-08-23	JH2	1	1					0
20	CON	M	PD48	2017-08-23	JH4	2	2	21	76			18
27	CON	M	PD48	2017-08-25	JH2	2	1	41	93			12
28	CON	M	PD48	2017-08-25	JH4	1	2	42	13			119
1	ELS	M	PD48	2017-07-19	209	1	1	1530	300	7	7	0
2	ELS	M	PD48	2017-07-19	211	2	2	1531	182	10	9	5
15	ELS	M	PD48	2017-07-21	209	3	1	1544	300	5	7	0
16	ELS	M	PD48	2017-07-21	211	1	2	1545	33	15	27	27
17	ELS	M	PD48	2017-08-23	JH 1	1	1	19	85			19
18	ELS	M	PD48	2017-08-23	JH3	2	2	20	27			22
25	ELS	M	PD48	2017-08-25	JH1	2	1	39	162			8
26	ELS	M	PD48	2017-08-25	JH3	1	2	40	237			5
7	Con	F	PD48	2017-07-19	208	10	1	1536	4	43	11	43
8	Con	F	PD48	2017-07-19	210	11	2	1537	260	7	9	7
9	Con	F	PD48	2017-07-21	208	11	1	1538	240	23	7	23
10	Con	F	PD48	2017-07-21	212	11	2	1539	7	76	10	76
23	Con	F	PD48	2017-08-23	JH2	6	1	24	48			2
24	Con	F	PD48	2017-08-23	JH4	7	2	25	144			34
31	Con	F	PD48	2017-08-28	JH2	7	1	45	128			13
32	Con	F	PD48	2017-08-28	JH4	9	2	46	45			70
5	ELS	F	PD48	2017-07-19	209	10	1	1534	189	10	9	24
6	ELS	F	PD48	2017-07-19	209	10	2	1535	3	14	11	43
11	ELS	F	PD48	2017-07-21	211	9	1	1540	5	10	7	12
12	ELS	F	PD48	2017-07-21	213	9	2	1541	50	15	15	60
21	ELS	F	PD48	2017-08-23	JH1	6	1	22	188			47
22	ELS	F	PD48	2017-08-23	JH3	7	2	23	175			17
29	ELS	F	PD48	2017-08-25	JH1	7	1	43	300			0
30	ELS	F	PD48	2017-08-25	JH3	6	2	44	15			24
