# Supplementary material for: Altered corticolimbic connectivity reveals sex-specific adolescent outcomes in a rat model of early life adversity
Source: eLife journal article supplement (doi:10.7554/elife.52651), 2020-01-20
Supplement: supp [file elife_poa_e52651_Figure_1_figure_supplement_1.docx]

**Figure 1-Figure Supplement 1**: No effects of sex or rearing condition on BLA volume. There were no significant effects of sex or rearing on basolateral amygdala (BLA)volume as estimated via Cavalieri probe across the rostral-caudal extent of the structure in PD28 (A), PD38 (B), or PD48 (C) rats. n=4 per group. As such, data presented in panels A, B, and C were collapsed across sex and rearing condition for each age group to determine average BLA volume (n=16 per age). n.s. (non-significant)
