# Supplementary material for: Altered corticolimbic connectivity reveals sex-specific adolescent outcomes in a rat model of early life adversity
Source: eLife journal article supplement (doi:10.7554/elife.52651), 2020-01-20
Supplement: supp [file elife_poa_e52651_Figure_1_figure_supplement_2.docx]

**Figure 1-Figure Supplement 2**: PFC innervation is not driven by percentage of BLA filled or bolus size in included cases. All included cases for each age (PD28, PD38, and PD48) were collapsed across sex and rearing condition to determine whether the percentage of BLA that was filled, and/or the total bolus size (both within and outside of the BLA structure) was related to total PFC axonal innervation in included cases (n=29-32 per age). There were no observed relationships between these measures at any age, suggesting no need for correcting innervation based on bolus characteristics measured. Bolus size and location (i.e. % in and outside of BLA structure) were determined via Cavalieri probe volume estimate across the rostral-caudal extent of the biotinylated dextran amine (BDA) anterograde tracer bolus.
