# Supplementary material for: Altered corticolimbic connectivity reveals sex-specific adolescent outcomes in a rat model of early life adversity
Source: eLife journal article supplement (doi:10.7554/elife.52651), 2020-01-20
Supplement: supp [file elife_poa_e52651_Figure_2_figure_supplement_1.docx]

**Figure 2-Figure Supplement 3:** No differences in mounted thickness or probe volume.

Mounted thickness (µm) was assessed across the Z plane for each quantified tissue section for each animal, and this measure was averaged for each animal, and an average tissue thickness for each group within each age was computed (A). There were no significant differences in mounted thickness across groups at any age, as well as no significant differences as a function of age. The average total probe volume (PL+IL) for StereoInvestigator analysis of BLA-PFC axon fiber length for each brain region per animal was also computed for each age (B), and no significant differences were found. n=6-9 per group. n.s. (non-significant)
