# Supplementary material for: Altered corticolimbic connectivity reveals sex-specific adolescent outcomes in a rat model of early life adversity
Source: eLife journal article supplement (doi:10.7554/elife.52651), 2020-01-20
Supplement: supp [file elife_poa_e52651_Figure_5_figure_supplement_1.docx]

**Figure 5: Figure Supplement 4**: Effect size maps for cortical sections comparing CON to ELS in males and females at PD28 or PD48. Effect sizes in the regions highlighted in Figure 5 range from 1.4 - 2.8. Full set of effect size maps generated are available on Dryad <https://datadryad.org/stash/share/5u-rMFOwFrQvAHLThMjzn-rTA7Ne3HDELZbvjfTR0Ks>
