# Supplementary material for: Altered corticolimbic connectivity reveals sex-specific adolescent outcomes in a rat model of early life adversity
Source: eLife journal article supplement (doi:10.7554/elife.52651), 2020-01-20
Supplement: supp [file elife_poa_e52651_Figure_6_figure_supplement_1.docx]

**Figure 6-Figure Supplement 5:** Similar to findings in Figure 3 (main article), no effect of rearing on anxiety-like behavior was seen at PD28 or PD48

**Supplementary File 2**: Table of non-significant results illustrated in Figure 3

| **Measure** | **Source** | **df** | **F** | **p** | **partial η2** |
| --- | --- | --- | --- | --- | --- |
| **Male**  **Seconds in Open Arm (EPM)** | Age | 2 | 1.691 | 0.189 | 0.031 |
| Rearing | 1 | 0.204 | 0.652 | 0.002 |
| Age x Rearing | 2 | 1.533 | 0.221 | 0.028 |
